# Supplementary material
Source: publisher figshare collection journal article supplement (https://tandf.figshare.com/ndownloader/files/21654246)
Supplement: Supplementary file 1 [file 21654246]

**An Expedient Four Component Synthesis of Substituted Pyrido-pyrimidine Heterocycles in Glycerol: Proline based Low Transition Temperature Mixture (LTTM) and their Antioxidant Activity with Molecular Docking Studies**

**Priyanka P. Mohirea, Dattatray R. Chandamc, Ajinkya A. Patravaled, Prafulla Choudharie, Vishram Karandea, Jai. S. Ghosha, Madhukar B. Deshmukh*a,b**

aChemistry Research Laboratory, Department of Agrochemicals & Pest Management, Shivaji University, Kolhapur-416004, Maharashtra, India.

bHeterocyclic Chemistry Laboratory, Department of Chemistry, Shivaji University, Kolhapur-416004, Maharashtra, India.

cDepartment of Chemistry, BhogawatiMahavidyalaya, Kurukali, Kolhapur-416001, Maharashtra, India.

dDepartment of Chemistry, Vivekananda College Kolhapur-416004, Maharashtra, India.

eDepartment of Pharmaceutical Chemistry, Bharati Vidyapeeth College of Pharmacy, Kolhapur-416013, Maharashtra, India

Email: [shubhlaxmi111@gmail.com](mailto:shubhlaxmi111@gmail.com)

**CONTENTS**

| **Sr. No.** | **Contents** | **Page no.** |
| --- | --- | --- |
| 1. | Green metrics calculations | 2 |
| 2. | **Table:** Green Chemistry Metrics Calculations of synthesized derivatives 4d1 to 4d13 | 3 |
| 3. | **Table 5** DPPH radical scavenging activity of pyrido[2,3-*d*]pyrimidine derivatives | 4 |
| 4. | Fig.1: Significant interaction of molecule **4d12** with myeloperoxidase  Fig.2: Significant interaction of molecule **4d13** with myeloperoxidase | 5 |
|  | Spectroscopic analysis of Synthesized Compounds | 6-26 |

**Green Metrics calculations:**

The green metrics such as mass intensity (MI), reaction mass efficiency (RME), carbon efficiency (CE), atom economy (AE) and E-factor have been evaluated for each derivatives using reported literature.1 It is expected that MI≈1%, RME≈100%, %CE≈100 and %AE≈100 and E-factor≈0. In the calculation, mass of catalyst is excluded as it is recyclable. Green metrics are defined in this manner.

1. Mass Intensity (MI) =

Total mass used in the process in g

Mass of product g

∑ Mass of products X 100

∑ Mass of reactant

1. Reaction mass efficiency (RME) =

No. of moles of Product X no. of carbons in Product X 100

No. of moles of Reactant X no. of carbons in Reactant

1. Carbon efficiency (CE) =

Weight of desired product X 100

∑ Molecular weight of all reactant

1. Atom economy (AE) =

Mass of reactant –Mass of product

Mass of product

∑Mass of waste

Mass of product

1. E-factor = =

**Table 4** Green metrics calculations of synthesized derivatives 4d1 to 4d13

| **Entry** | **Compd.**  **Code** | **% Yield** | **FW Product** | **Yield (g)** | **MI** | **% RME** | **% CE** | **% AE** | **E-**  **Factor** |
| --- | --- | --- | --- | --- | --- | --- | --- | --- | --- |
| 1. | 4d1 | 90 | 323.3028 | 290.9725 | 1.23 | 80.83 | 90 | 80.83 | 0.23 |
| 2. | 4d2 | 84 | 357.7478 | 300.5081 | 1.31 | 76.14 | 84 | 76.14 | 0.31 |
| 3. | 4d3 | 88 | 357.7478 | 314.8180 | 1.25 | 79.94 | 88 | 79.94 | 0.25 |
| 4. | 4d4 | 92 | 357.7478 | 329.1279 | 1.19 | 83.50 | 92 | 83.50 | 0.19 |
| 5. | 4d5 | 86 | 368.3003 | 316.7382 | 1.27 | 78.27 | 86 | 78.27 | 0.27 |
| 6. | 4d6 | 90 | 402.1988 | 361.9789 | 1.21 | 82.46 | 90 | 82.46 | 0.21 |
| 7. | 4d7 | 92 | 402.1988 | 370.0228 | 1.18 | 84.28 | 92 | 84.28 | 0.18 |
| 8. | 4d8 | 82 | 353.3288 | 289.7296 | 1.34 | 74.35 | 82 | 74.35 | 0.34 |
| 9. | 4d9 | 92 | 353.3288 | 325.0624 | 1.20 | 83.33 | 92 | 83.33 | 0.20 |
| 10. | 4d10 | 86 | 329.3305 | 283.2242 | 1.29 | 77.32 | 86 | 77.32 | 0.29 |
| 11. | 4d11 | 90 | 377.3502 | 339.6151 | 1.21 | 82.12 | 90 | 82.12 | 0.21 |
| 12. | 4d12 | 80 | 359.2837 | 287.4269 | 1.37 | 72.47 | 80 | 72.47 | 0.37 |
| 13. | 4d13 | 92 | 367.3123 | 337.9273 | 1.19 | 83.66 | 92 | 83.66 | 0.19 |

**Table 5** DPPH radical scavenging activity of pyrido[2,3-*d*]pyrimidine derivatives

| **Entry** | **Compd. Code.** | **(%of Inhibition) at**  **50 µg/ml** | **(%of Inhibition) at**  **100 µg/ml** |
| --- | --- | --- | --- |
| 1. | 4d1 | 44.31 | 45.57 |
| 2. | 4d2 | 47.17 | 48.18 |
| **3.** | **4d3** | **56.18** | **60.48** |
| 4. | 4d4 | 43.80 | 45.49 |
| **5.** | **4d5** | **49.36** | **55.09** |
| **6.** | 4d6 | 48.27 | 49.95 |
| 7. | 4d7 | 51.64 | 52.90 |
| 8. | 4d8 | 51.22 | 53.32 |
| 9. | 4d9 | 44.65 | 46.25 |
| 10. | 4d10 | 44.48 | 46.16 |
| 11. | 4d11 | 41.87 | 44.56 |
| **12.** | **4d12** | **59.22** | **63.43** |
| **13.** | **4d13** | **60.48** | **60.57** |
| **14.** | **Ascorbic acid** | **33.36** | **39.59** |


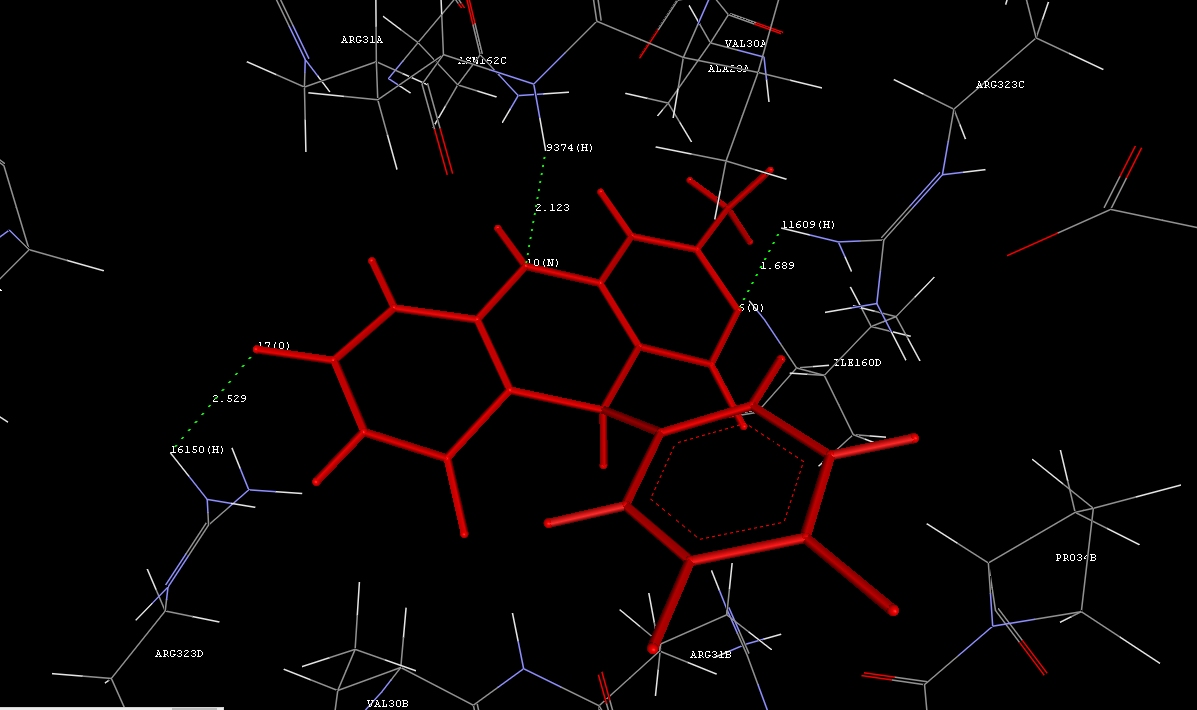


Fig.1: Significant interaction of molecule **4d12** with myeloperoxidase


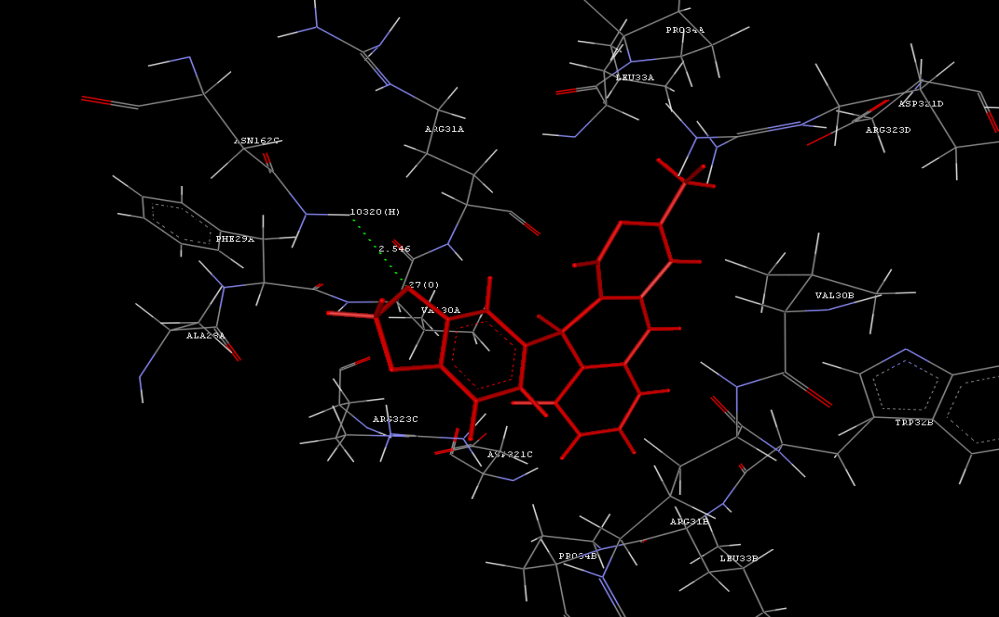


Fig.2: Significant interaction of molecule **4d13** with myeloperoxidase

**Spectroscopic analysis of Synthesized Compounds**


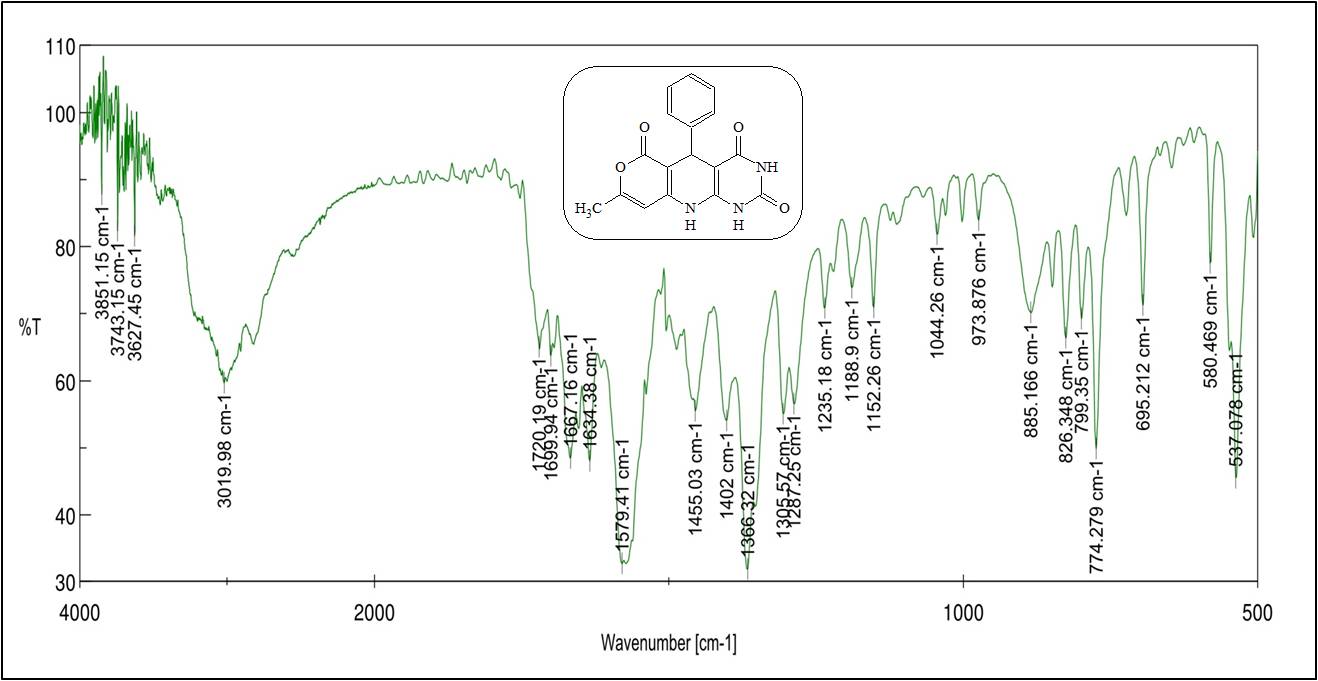


**Fig. 3: IR spectrum of 8-methyl-5-phenyl-5,10-dihydro-2*H*-pyrano[3',4':5,6]pyrido[2,3-*d*]pyrimidine-2,4,6(1*H*,3*H*)-trione (4d1)**

**
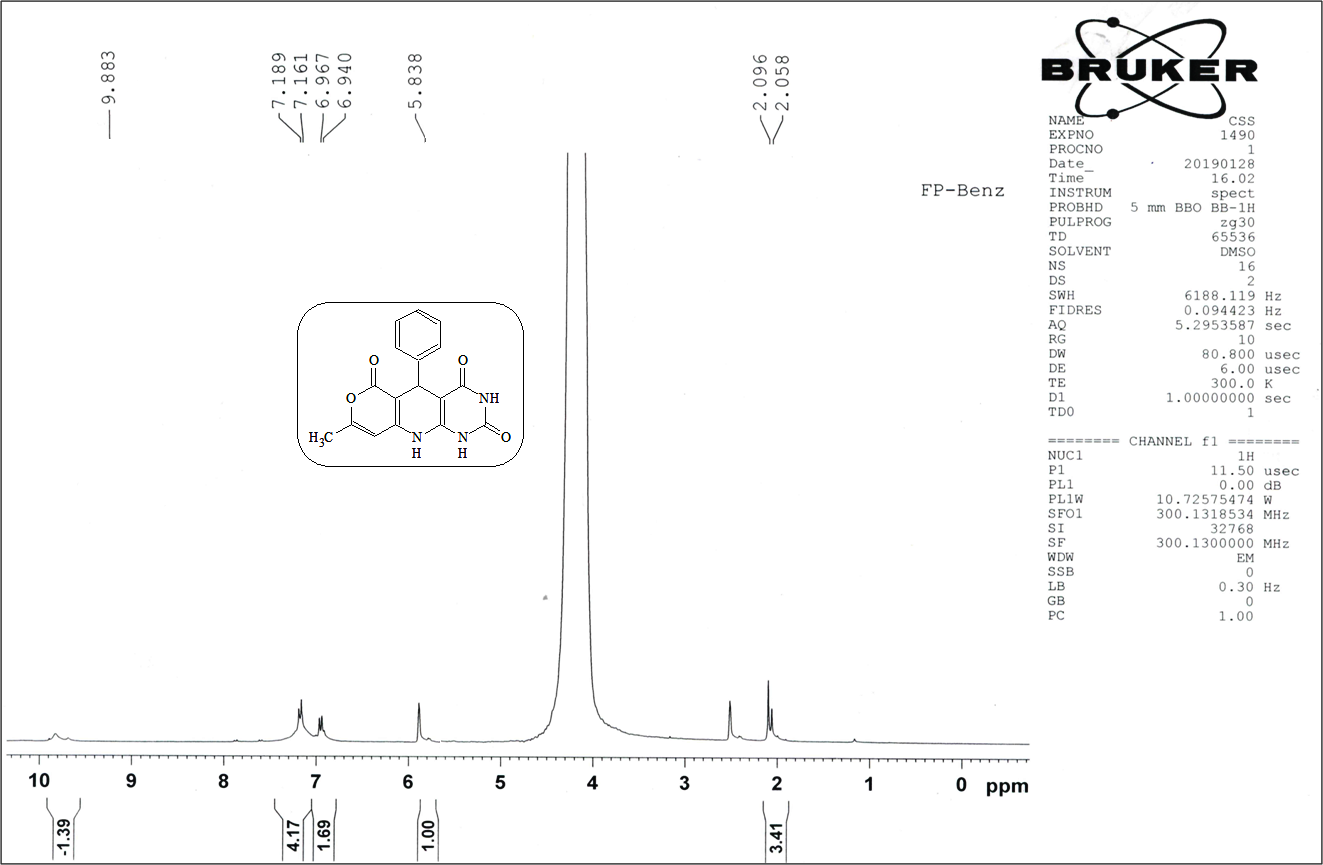
**

**Fig. 4: 1H NMR spectrum of 8-methyl-5-phenyl-5,10-dihydro-2*H*-pyrano[3',4':5,6]pyrido[2,3-*d*]pyrimidine-2,4,6(1*H*,3*H*)-trione** **(4d1)**


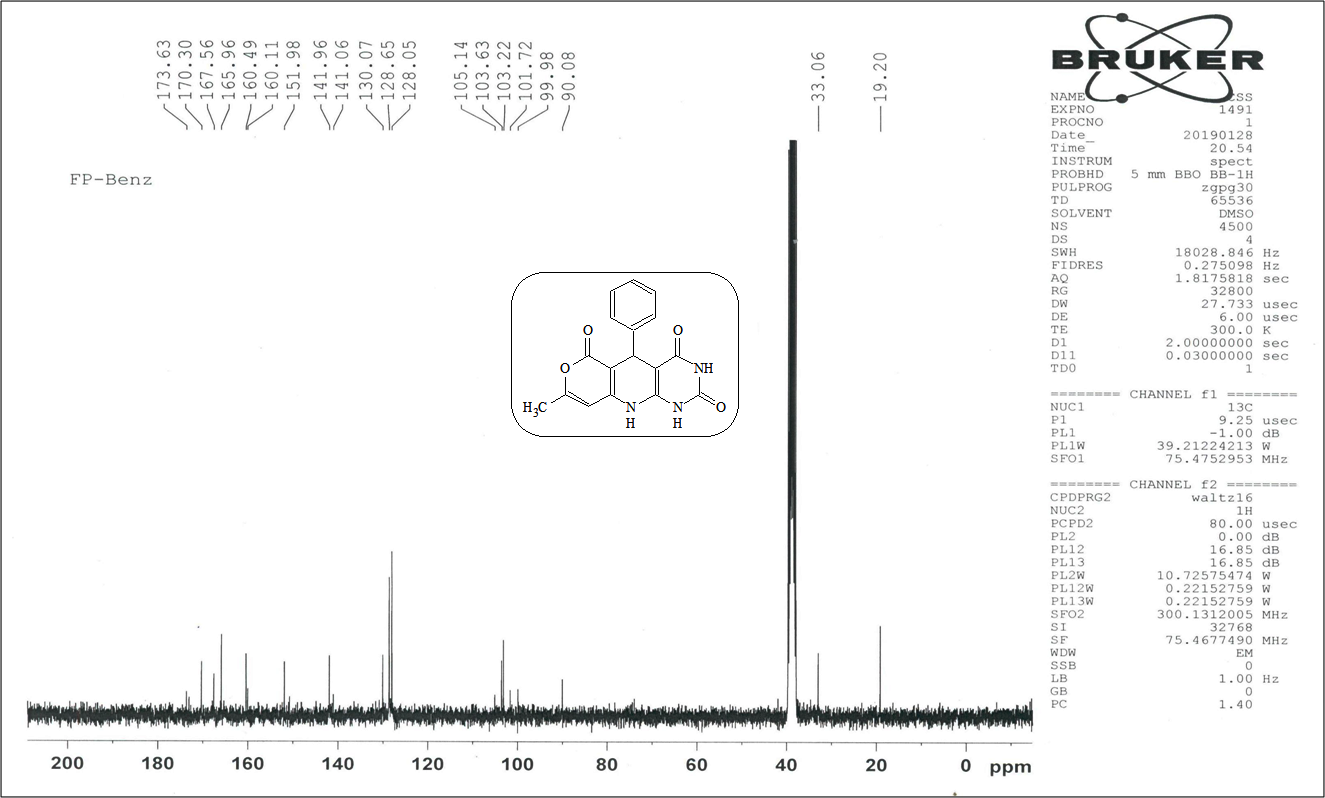


**Fig. 5: 13C NMR spectrum of 8-methyl-5-phenyl-5,10-dihydro-2*H*-pyrano[3',4':5,6]pyrido[2,3-*d*]pyrimidine-2,4,6(1*H*,3*H*)-trione** **(4d1)**


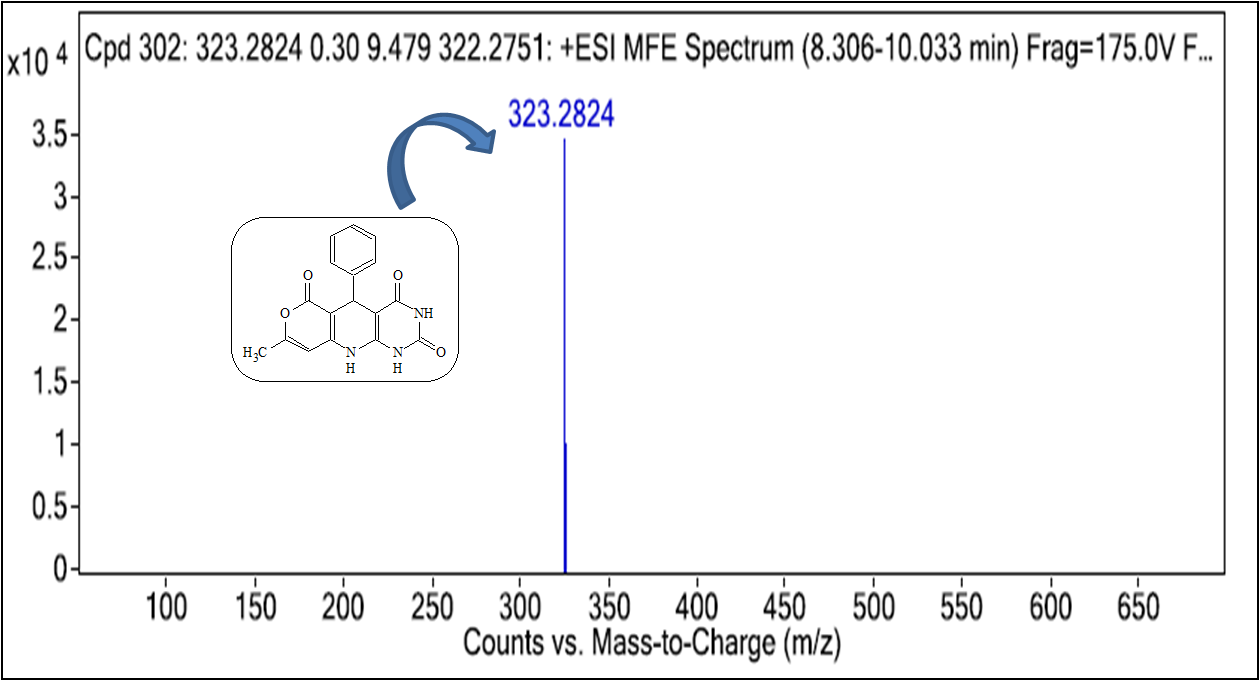


**Fig. 6: HRMS spectrum of 8-methyl-5-phenyl-5,10-dihydro-2*H*-pyrano[3',4':5,6]pyrido[2,3-*d*]pyrimidine-2,4,6(1*H*,3*H*)-trione** **(4d1)**


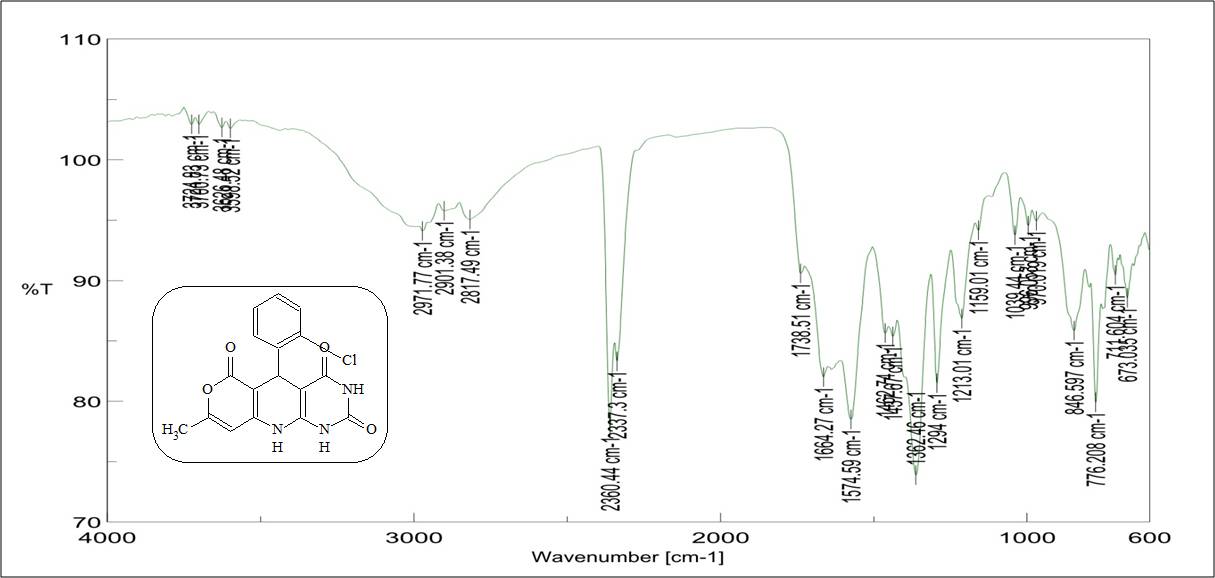


**Fig. 7: IR spectrum of 5-(2-chlorophenyl)-8-methyl-5,10-dihydro-2*H*-pyrano[3',4':5,6]pyrido[2,3-*d*]pyrimidine-2,4,6(1*H*,3*H*)-trione (4d2)**


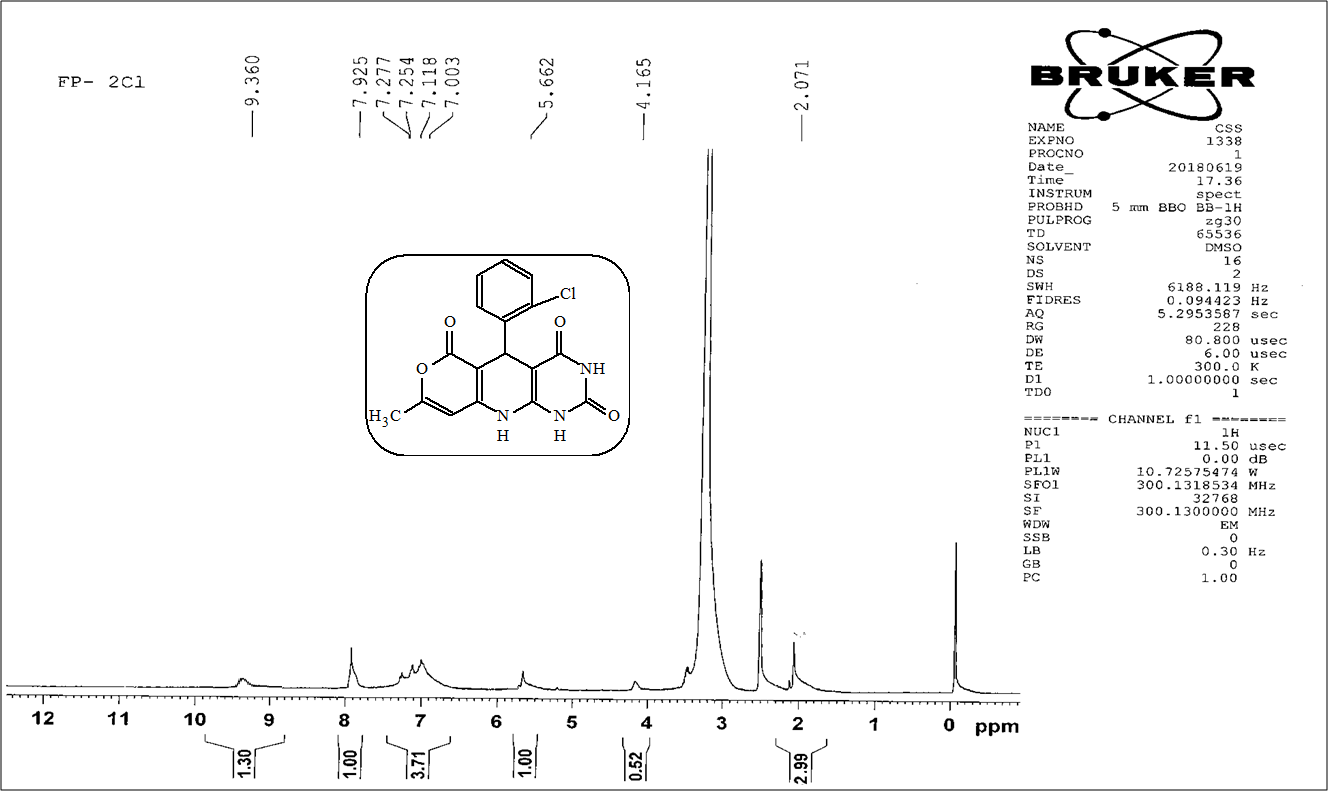


**Fig. 8: 1H NMR spectrum of 5-(2-chlorophenyl)-8-methyl-5,10-dihydro-2*H*-pyrano[3',4':5,6]pyrido[2,3-*d*]pyrimidine-2,4,6(1*H*,3*H*)-trione (4d2)**

**
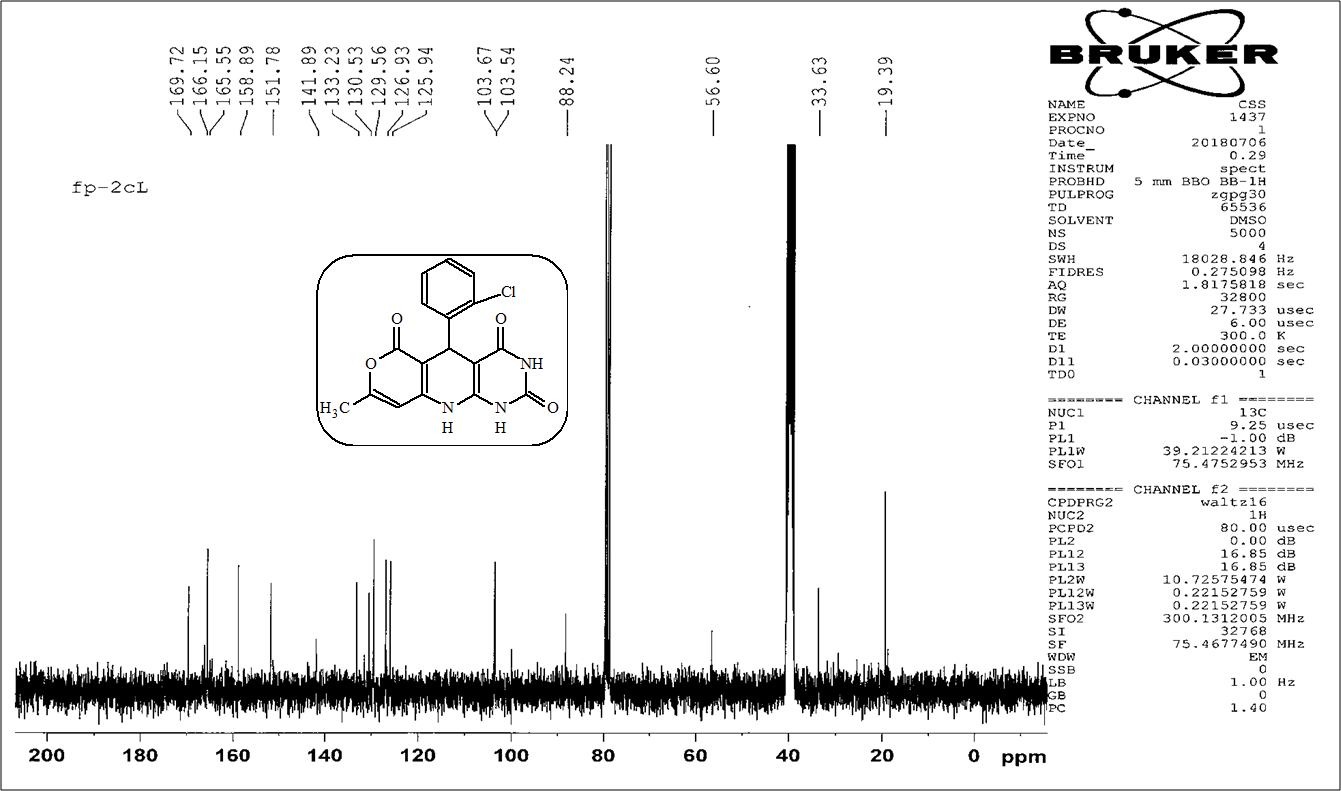
**

**Fig. 9: 13C NMR spectrum of 5-(2-chlorophenyl)-8-methyl-5,10-dihydro-2*H*-pyrano[3',4':5,6]pyrido[2,3-*d*]pyrimidine-2,4,6(1*H*,3*H*)-trione (4d2)**


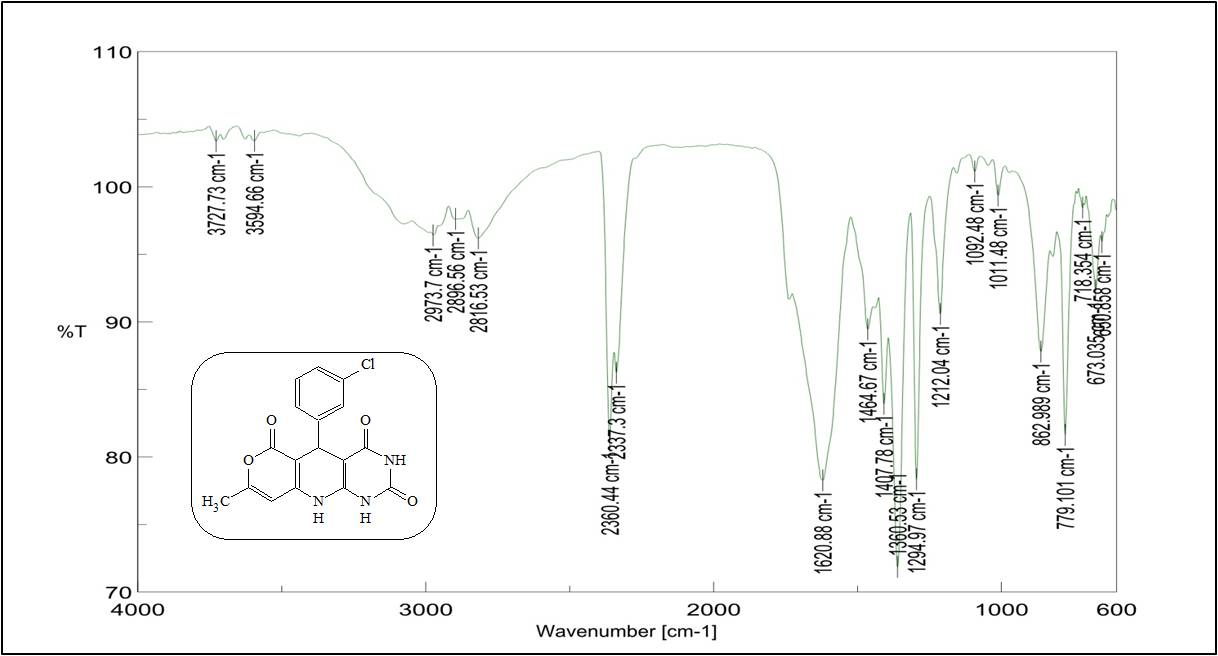


**Fig. 10: IR spectrum of 5-(3-chlorophenyl)-8-methyl-5,10-dihydro-2*H*-pyrano[3',4':5,6]pyrido[2,3-*d*]pyrimidine-2,4,6(1*H*,3*H*)-trione (4d3)**


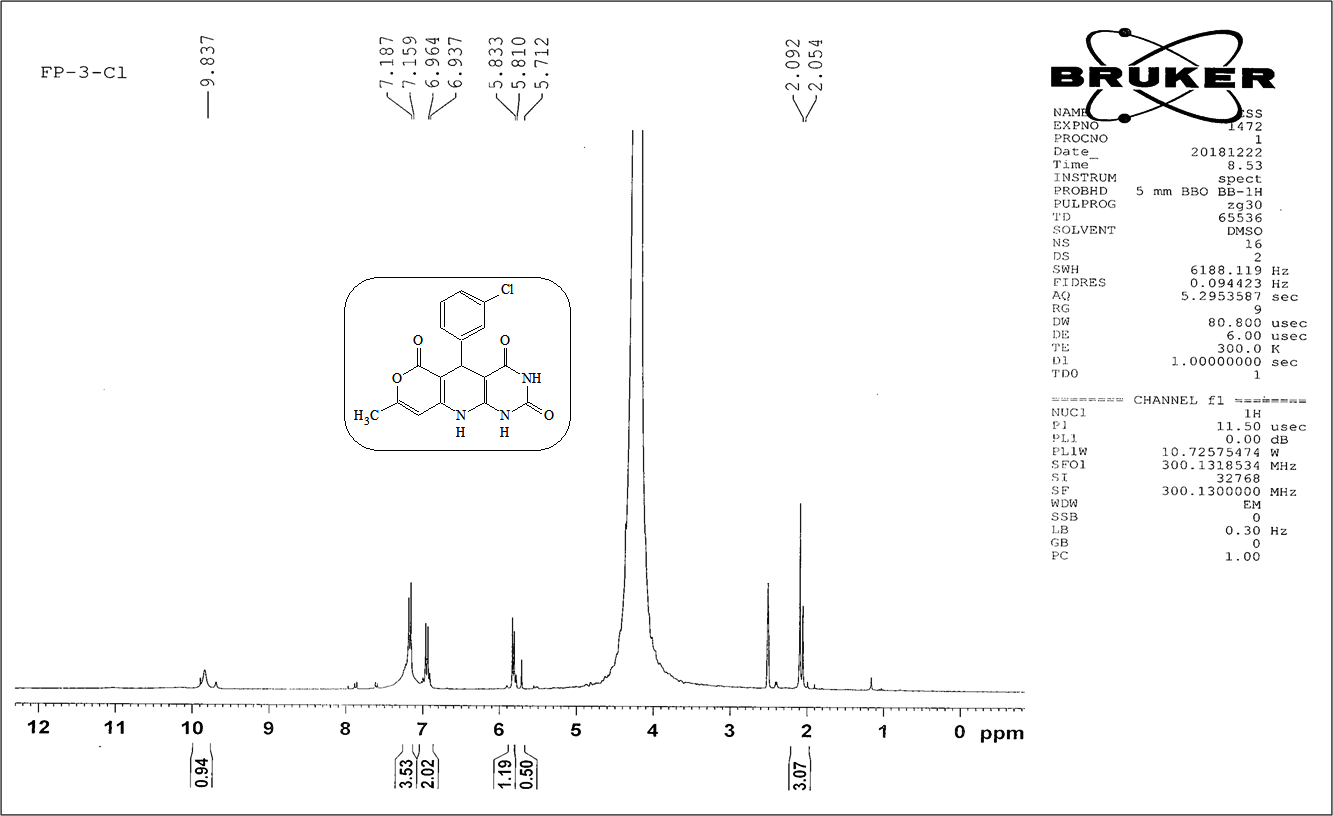


**Fig. 11: 1H NMR spectrum of 5 -(3-chlorophenyl)-8-methyl-5,10-dihydro-2*H*-pyrano[3',4':5,6]pyrido[2,3-*d*]pyrimidine-2,4,6(1*H*,3*H*)-trione (4d3)**


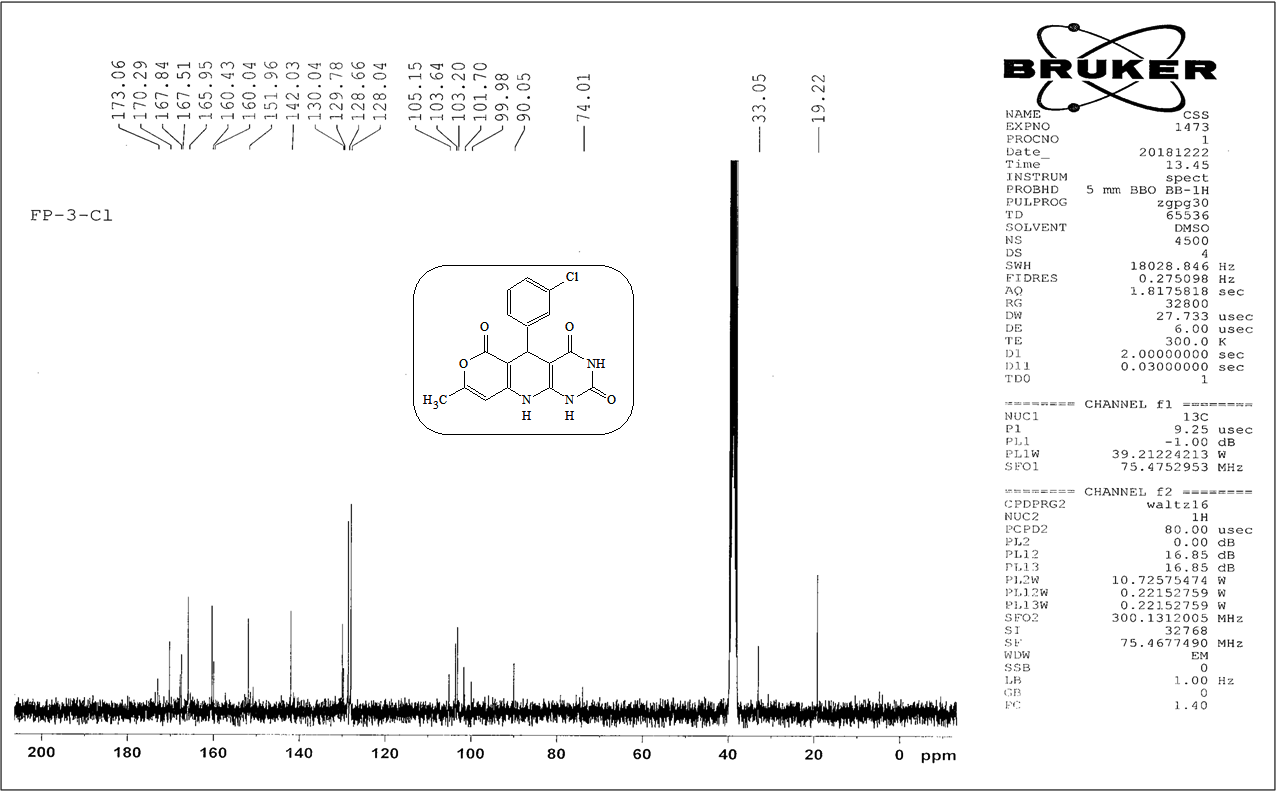


**Fig. 12: 13C NMR spectrum of 5 -(3-chlorophenyl)-8-methyl-5,10-dihydro-2*H*-pyrano[3',4':5,6]pyrido[2,3-*d*]pyrimidine-2,4,6(1*H*,3*H*)-trione (4d3)**


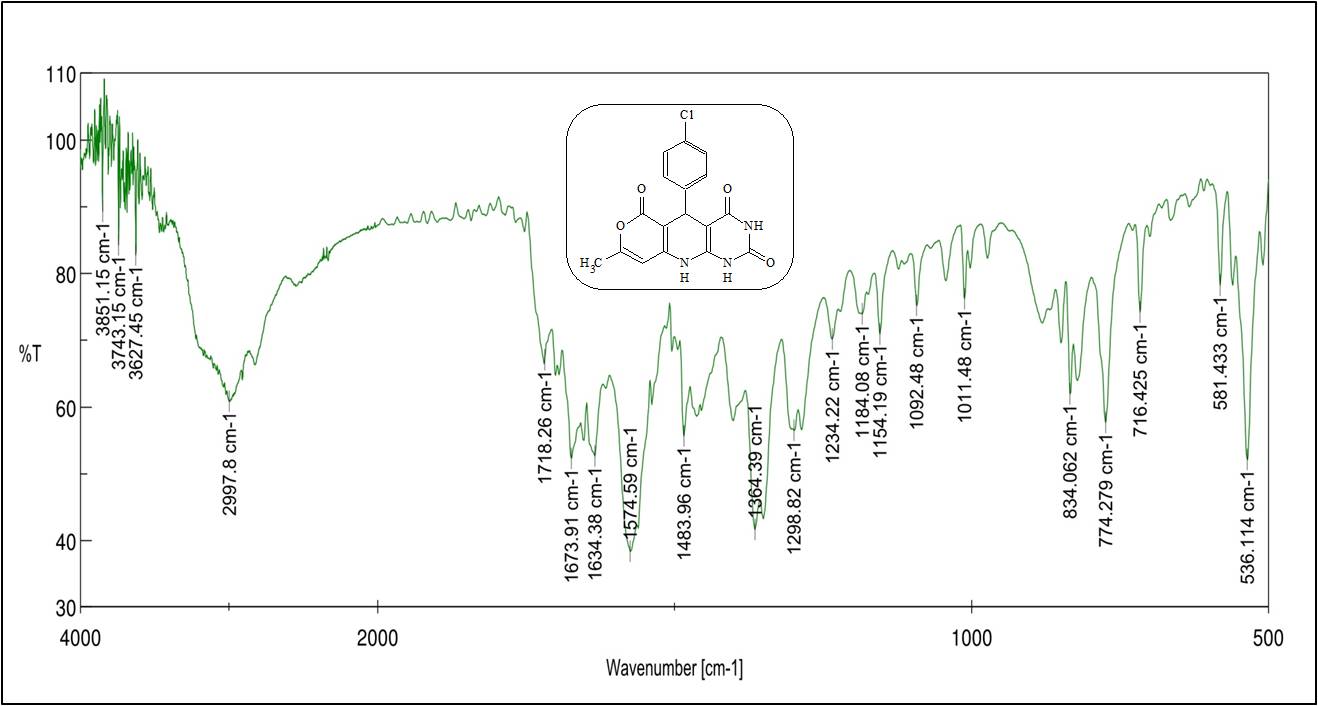


**Fig. 13: IR spectrum of 5-(4-chlorophenyl)-8-methyl-5,10-dihydro-2*H*-pyrano[3',4':5,6]pyrido[2,3-*d*]pyrimidine-2,4,6(1*H*,3*H*)-trione (4d4)**


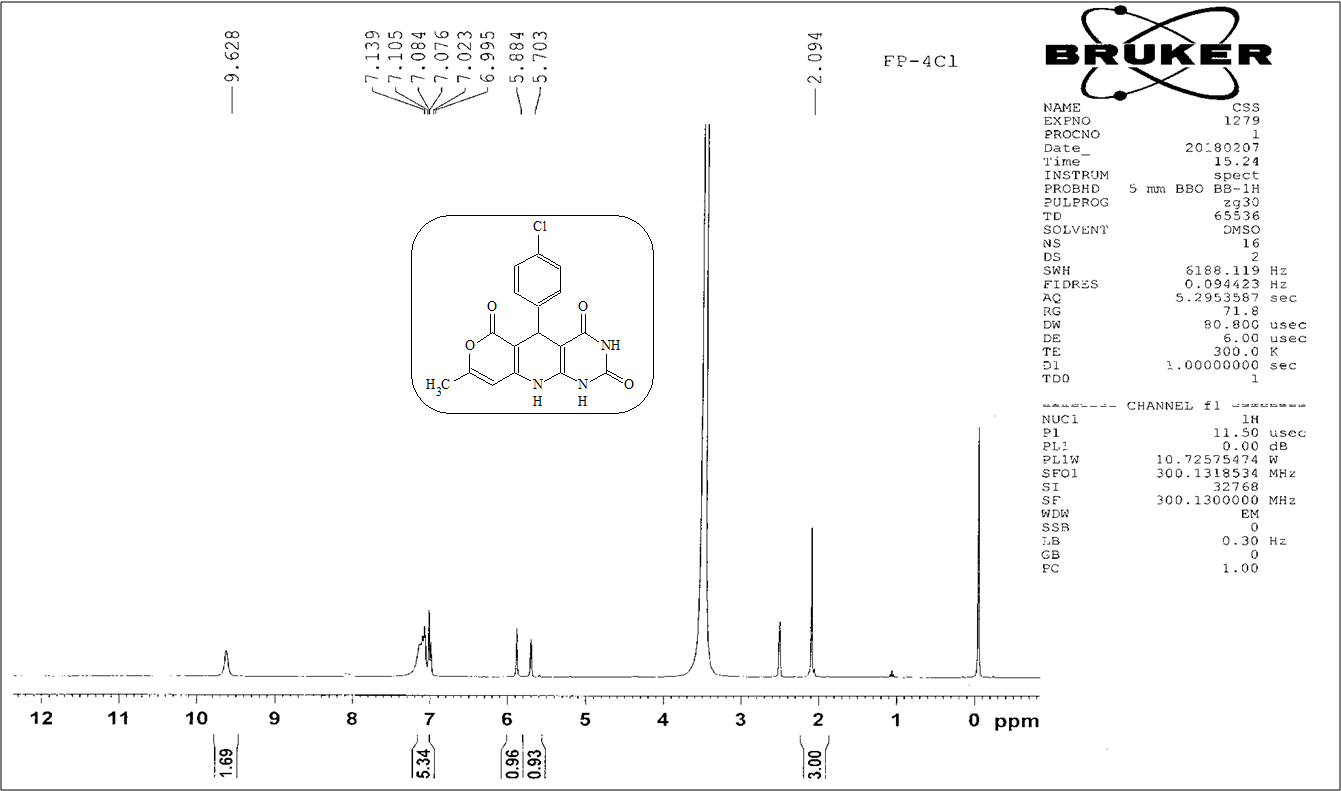


**Fig. 14: 1H NMR spectrum of 5-(4-chlorophenyl)-8-methyl-5,10-dihydro-2*H*-pyrano[3',4':5,6]pyrido[2,3-*d*]pyrimidine-2,4,6(1*H*,3*H*)-trione (4d4)**


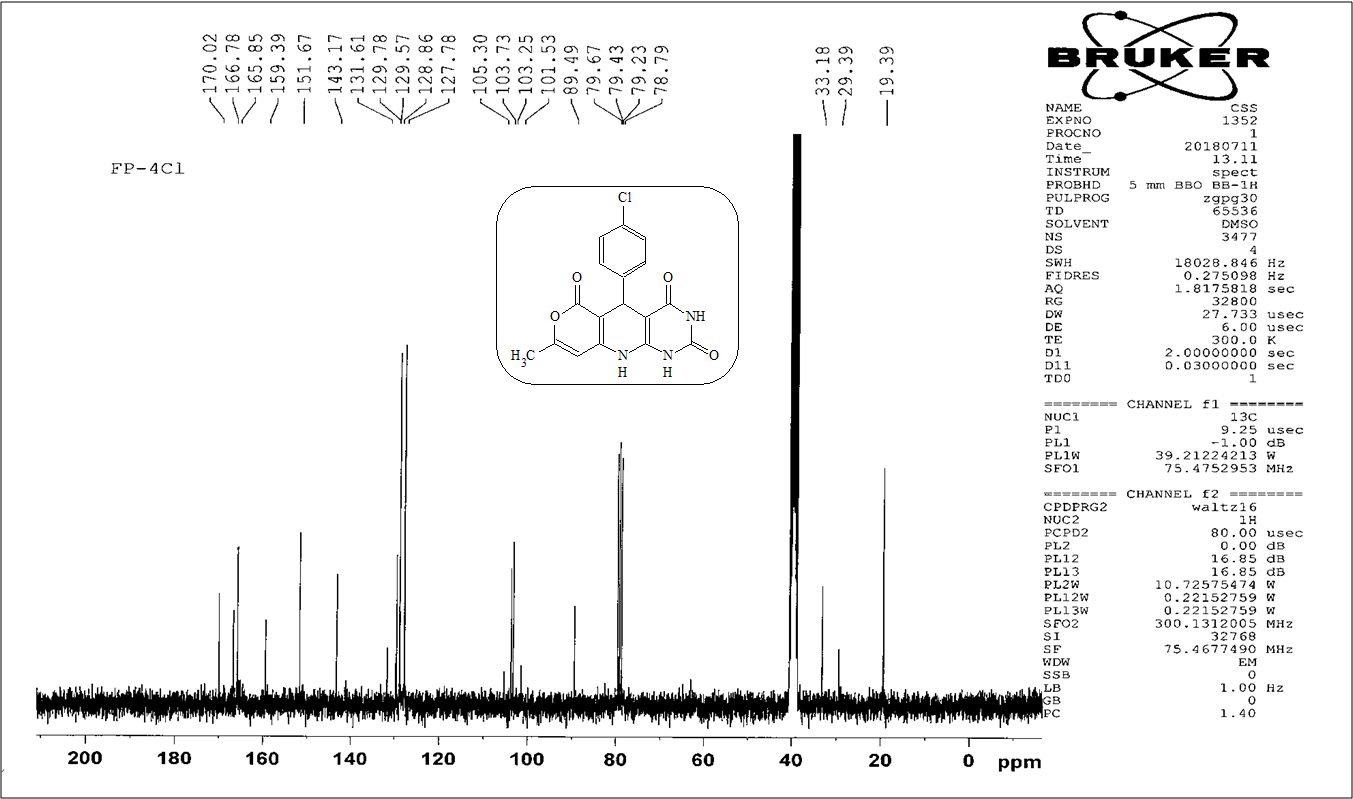


**Fig. 15: 13C NMR spectrum of 5-(4-chlorophenyl)-8-methyl-5,10-dihydro-2*H*-pyrano[3',4':5,6]pyrido[2,3-*d*]pyrimidine-2,4,6(1*H*,3*H*)-trione (4d4)**


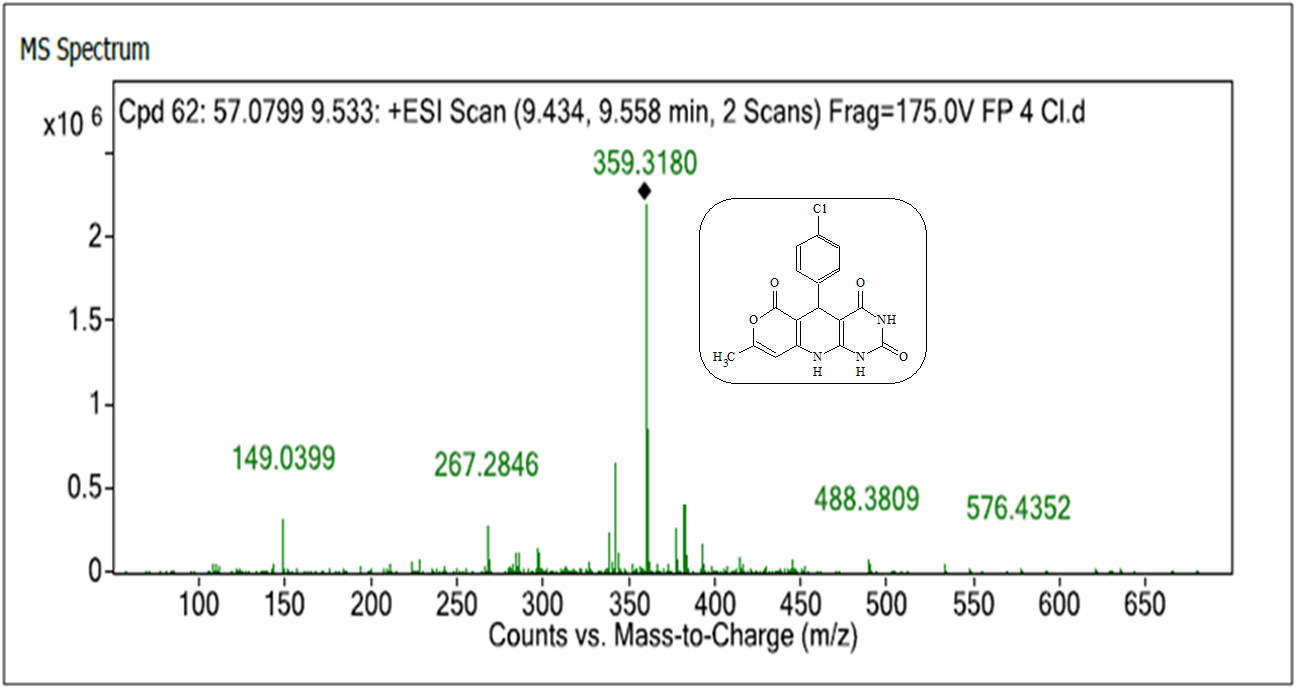


**Fig. 16: HRMS spectrum of 5-(4-chlorophenyl)-8-methyl-5,10-dihydro-2*H*-pyrano[3',4':5,6]pyrido[2,3-*d*]pyrimidine-2,4,6(1*H*,3*H*)-trione (4d4)**


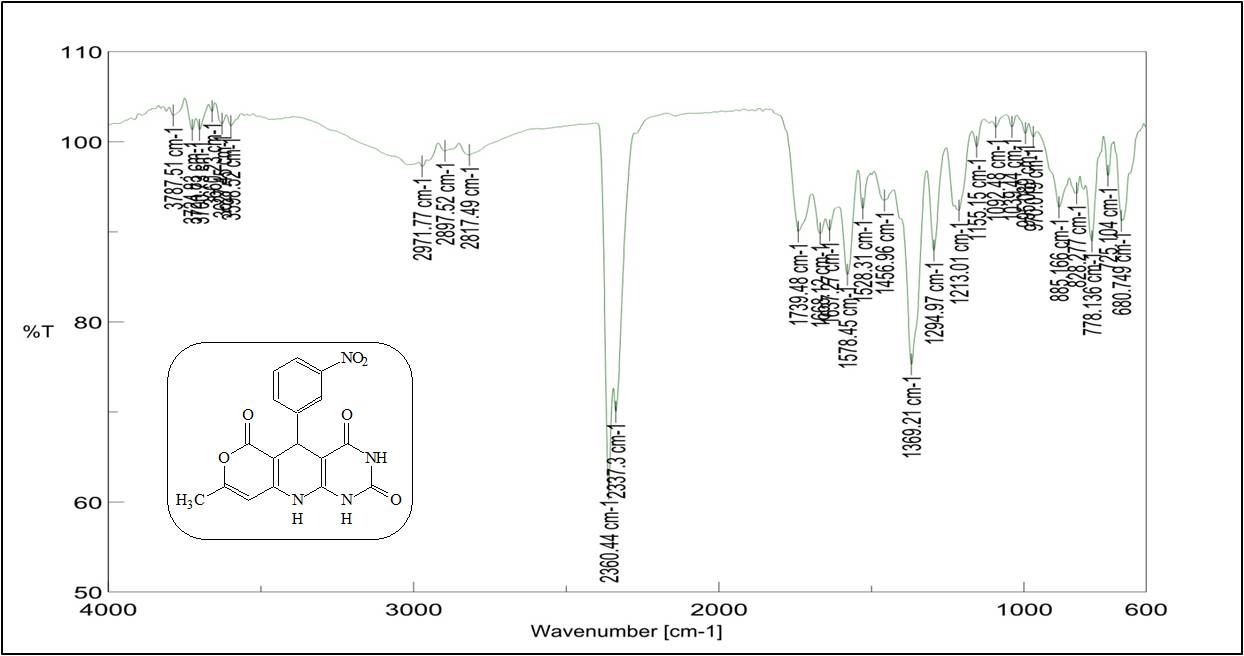


**Fig. 17: IR spectrum of 8-methyl-5-(3-nitrophenyl)-5,10-dihydro-2*H*-pyrano[3',4':5,6]pyrido[2,3-*d*]pyrimidine-2,4,6(1*H*,3*H*)-trione (4d5)**

**
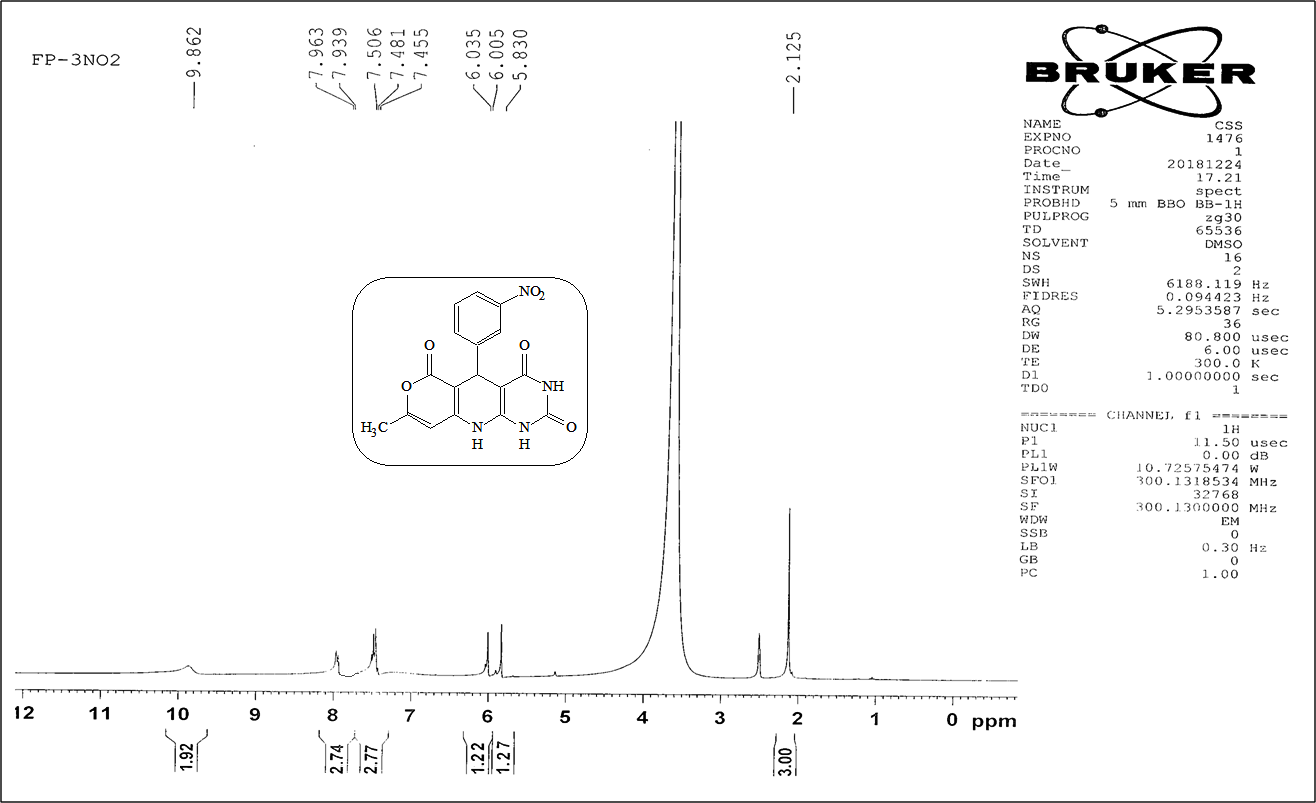
**

**Fig. 18: 1H NMR spectrum of8-methyl-5-(3-nitrophenyl)-5,10-dihydro-2*H*-pyrano[3',4':5,6]pyrido[2,3-*d*]pyrimidine-2,4,6(1*H*,3*H*)-trione (4d5)**


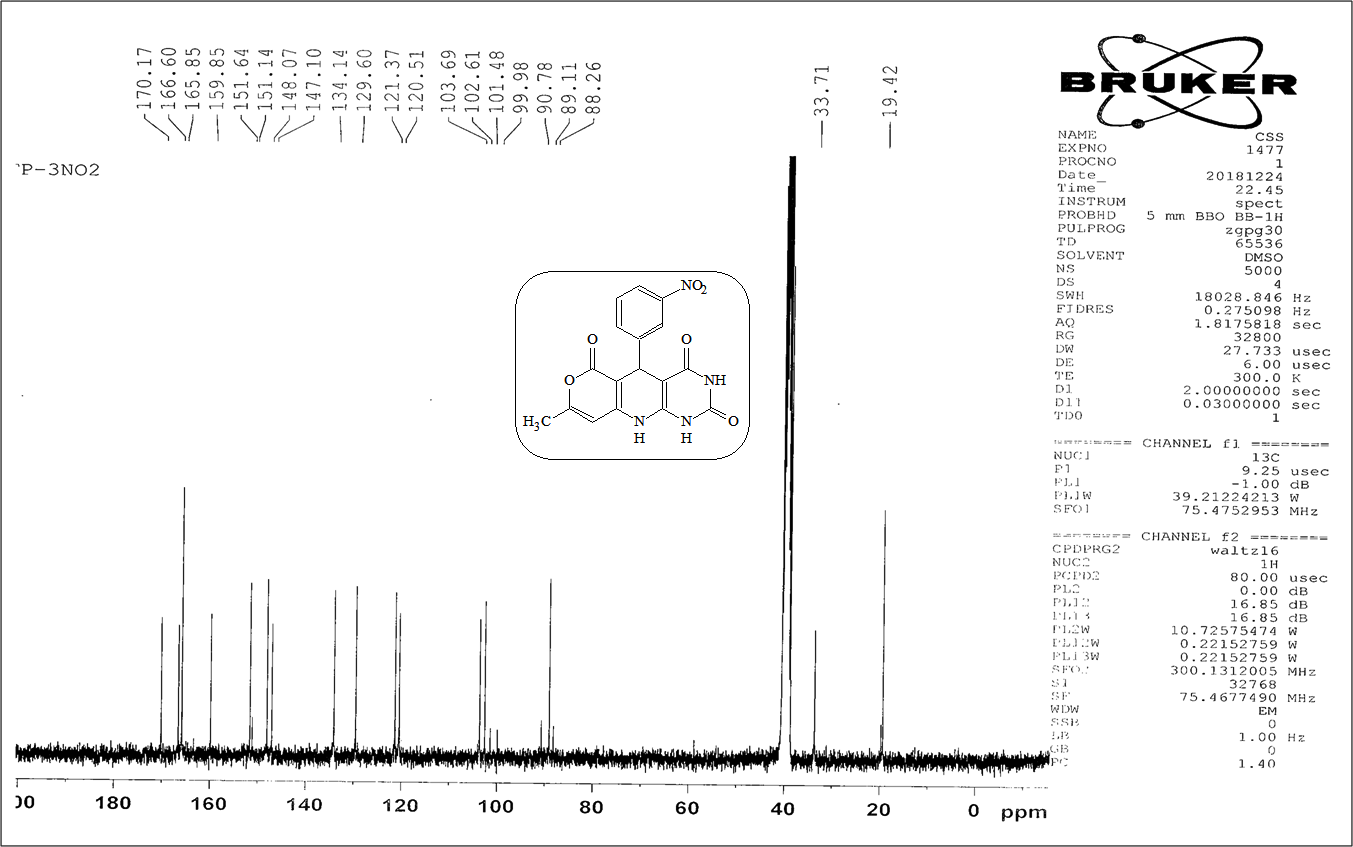


**Fig. 19: 13C NMR spectrum of 8-methyl-5-(3-nitrophenyl)-5,10-dihydro-2*H*-pyrano[3',4':5,6]pyrido[2,3-*d*]pyrimidine-2,4,6(1*H*,3*H*)-trione (4d5)**

**
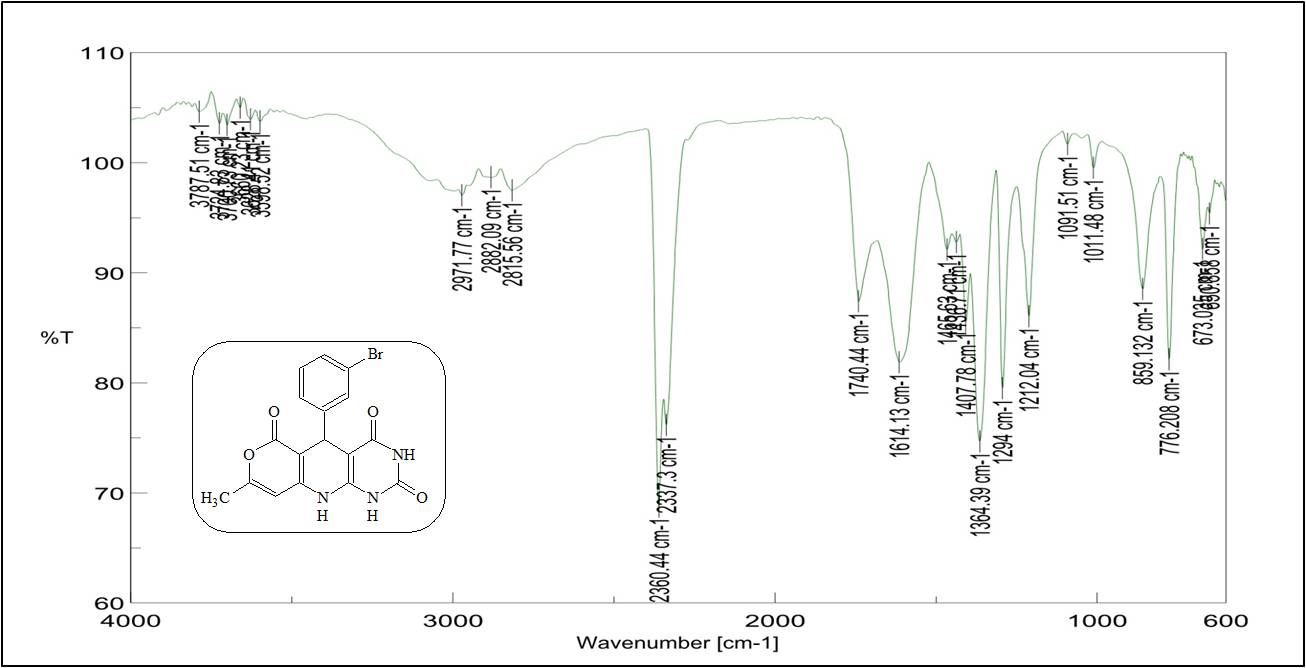
**

**Fig. 20: IR spectrum of 5-(3-bromophenyl)-8-methyl-5,10-dihydro-2*H*-pyrano[3',4':5,6]pyrido[2,3-*d*]pyrimidine-2,4,6(1*H*,3*H*)-trione (4d6)**

**
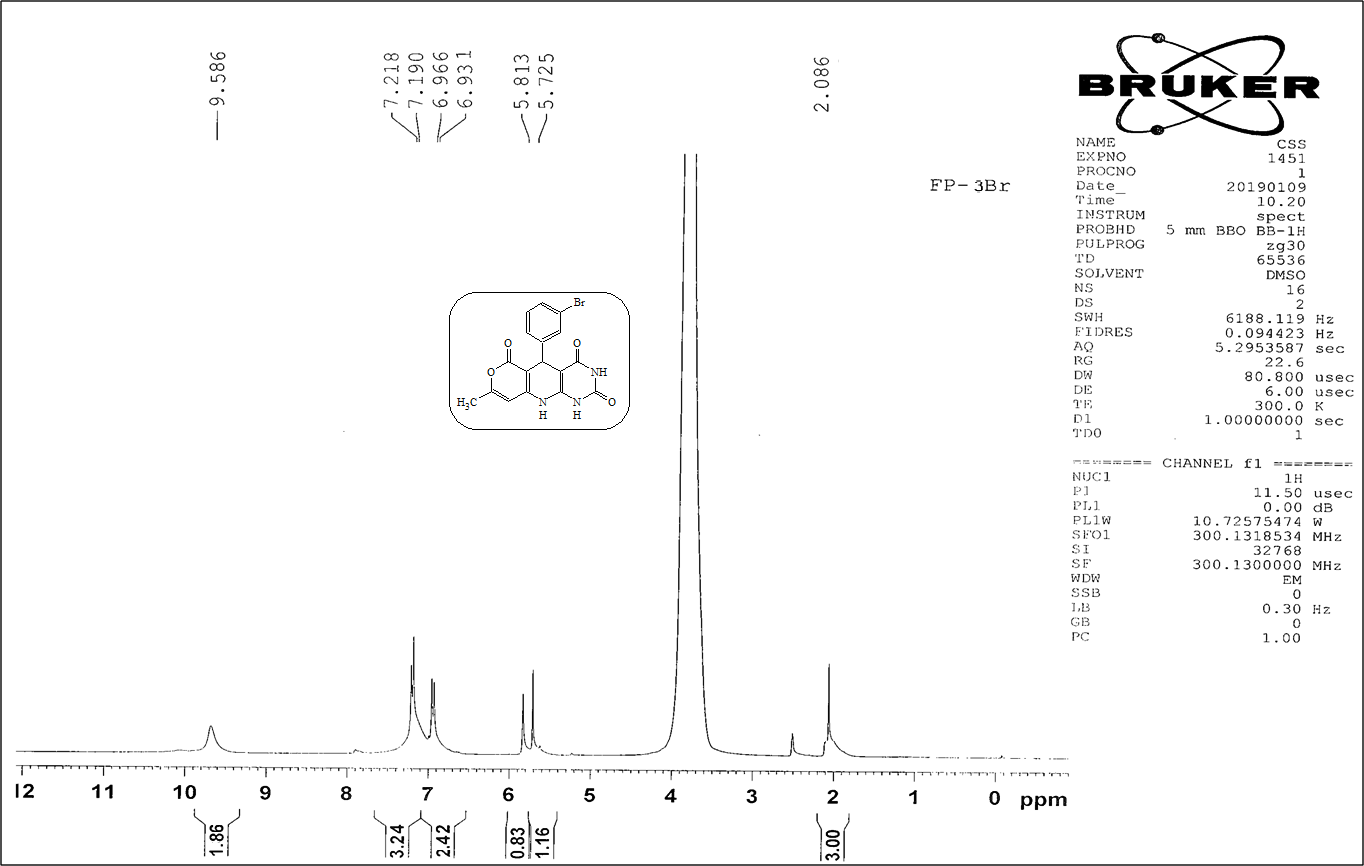
**

**Fig. 21: 1H NMR spectrum of 5-(3-bromophenyl)-8-methyl-5,10-dihydro-2*H*-pyrano[3',4':5,6]pyrido[2,3-*d*]pyrimidine-2,4,6(1*H*,3*H*)-trione (4d6)**

**
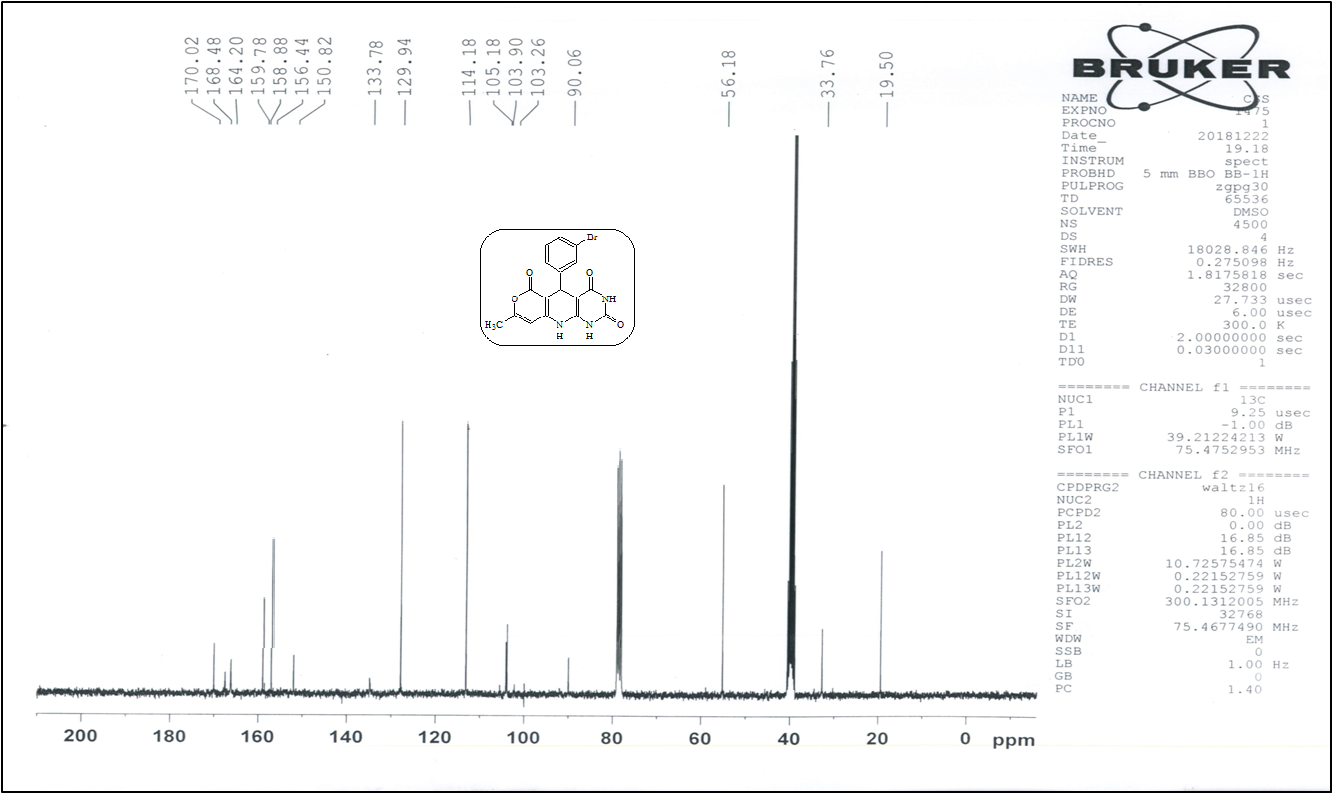
**

**Fig. 22: 13C NMR spectrum of 5-(3-bromophenyl)-8-methyl-5,10-dihydro-2*H*-pyrano[3',4':5,6]pyrido[2,3-*d*]pyrimidine-2,4,6(1*H*,3*H*)-trione (4d6**


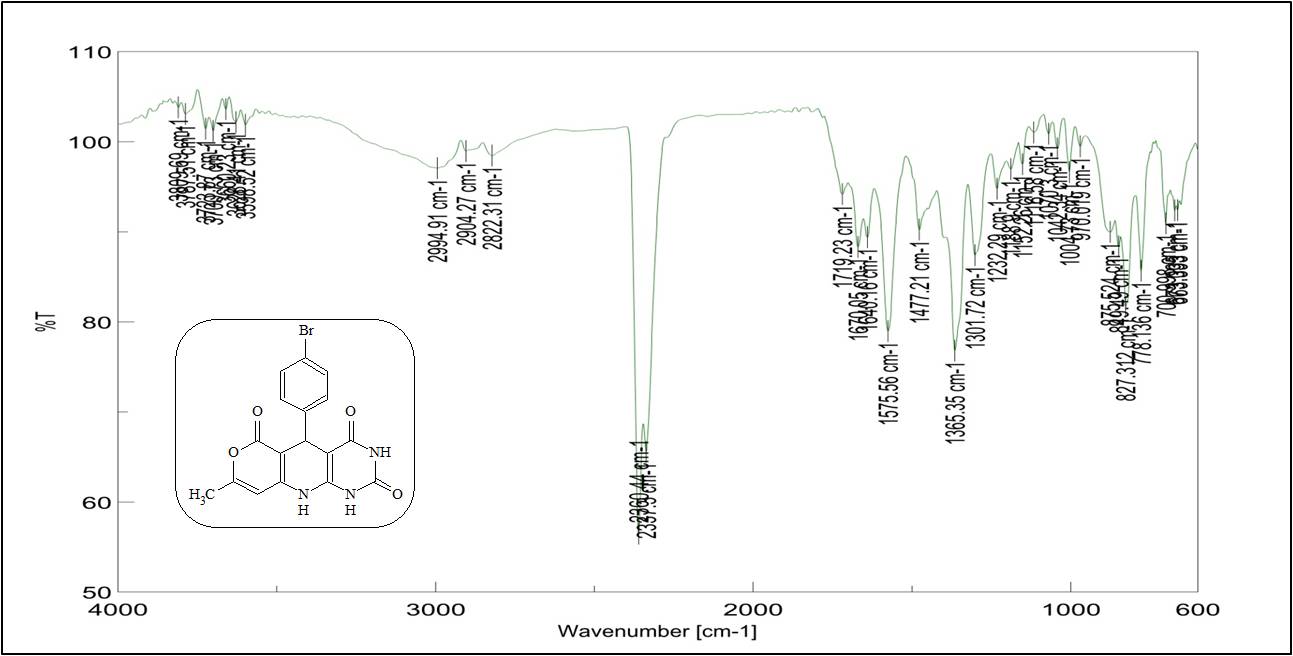


**Fig. 23: IR spectrum of 5-(4-bromophenyl)-8-methyl-5,10-dihydro-2*H*-pyrano[3',4':5,6]pyrido[2,3-*d*]pyrimidine-2,4,6(1*H*,3*H*)-trione (4d7)**


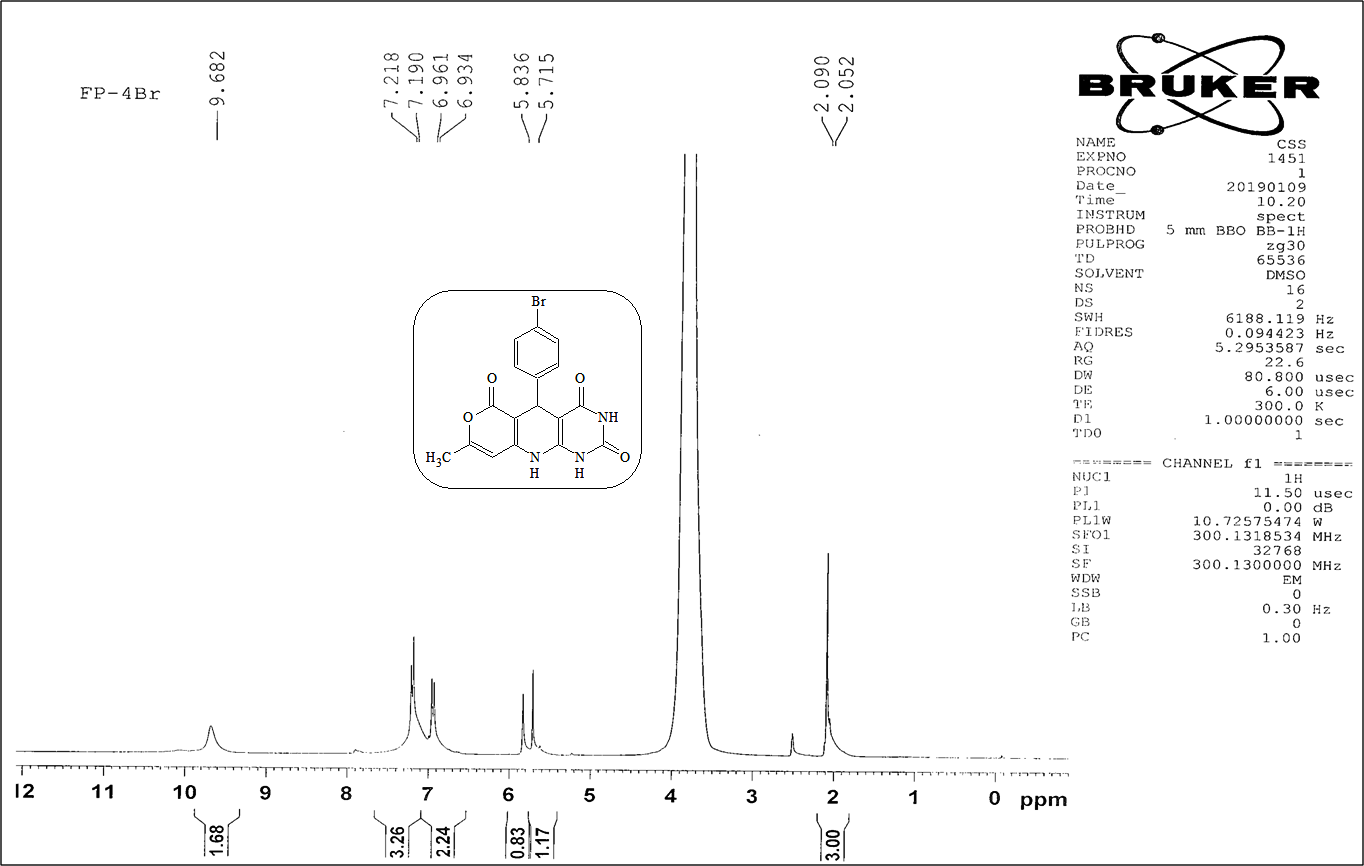


**Fig. 24: 1H NMR spectrum of 5-(4-bromophenyl)-8-methyl-5,10-dihydro-2*H*-pyrano[3',4':5,6]pyrido[2,3-*d*]pyrimidine-2,4,6(1*H*,3*H*)-trione (4d7)**


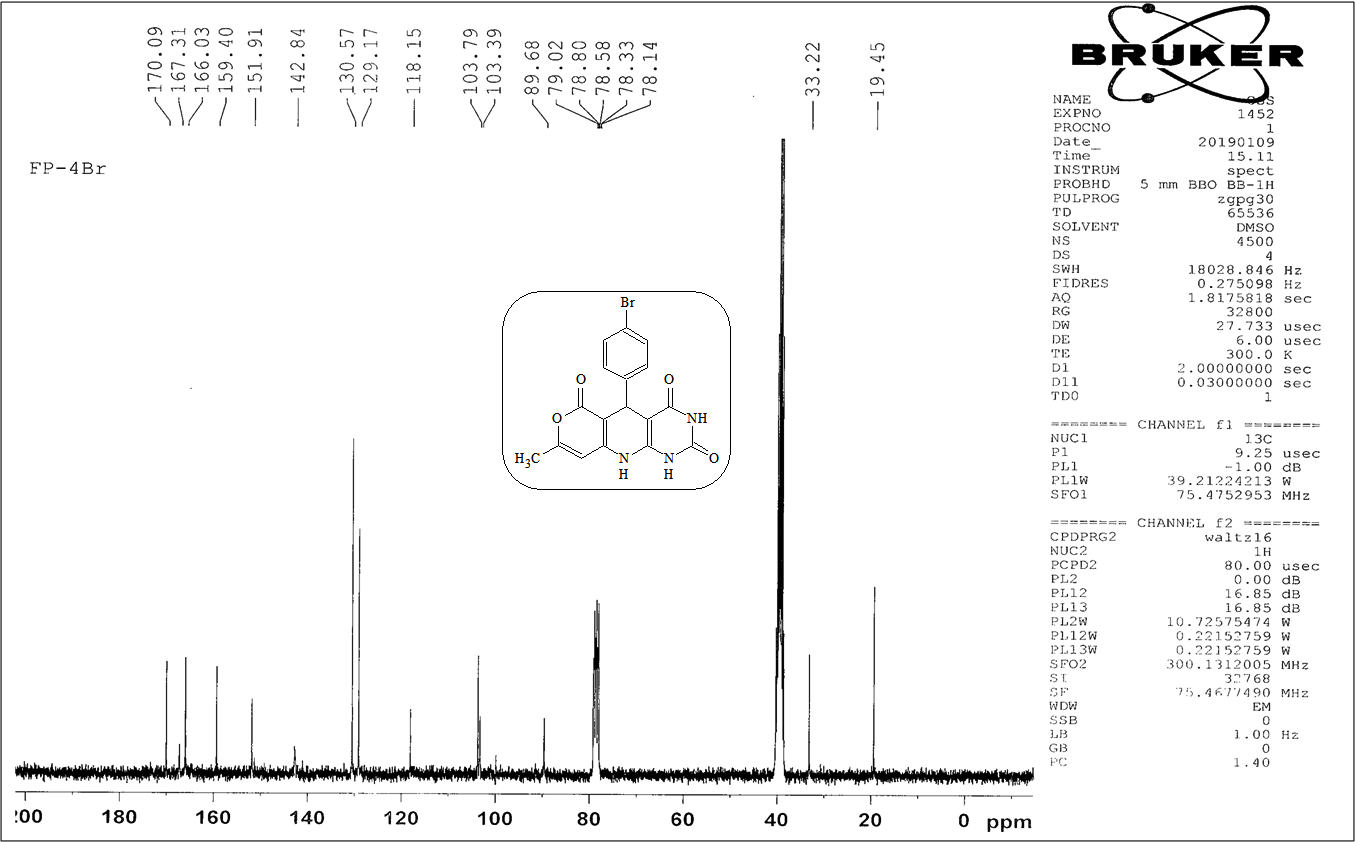


**Fig. 25: 13C NMR spectrum of 5-(4-bromophenyl)-8-methyl-5,10-dihydro-2*H*-pyrano[3',4':5,6]pyrido[2,3-*d*]pyrimidine-2,4,6(1*H*,3*H*)-trione (4d7)**


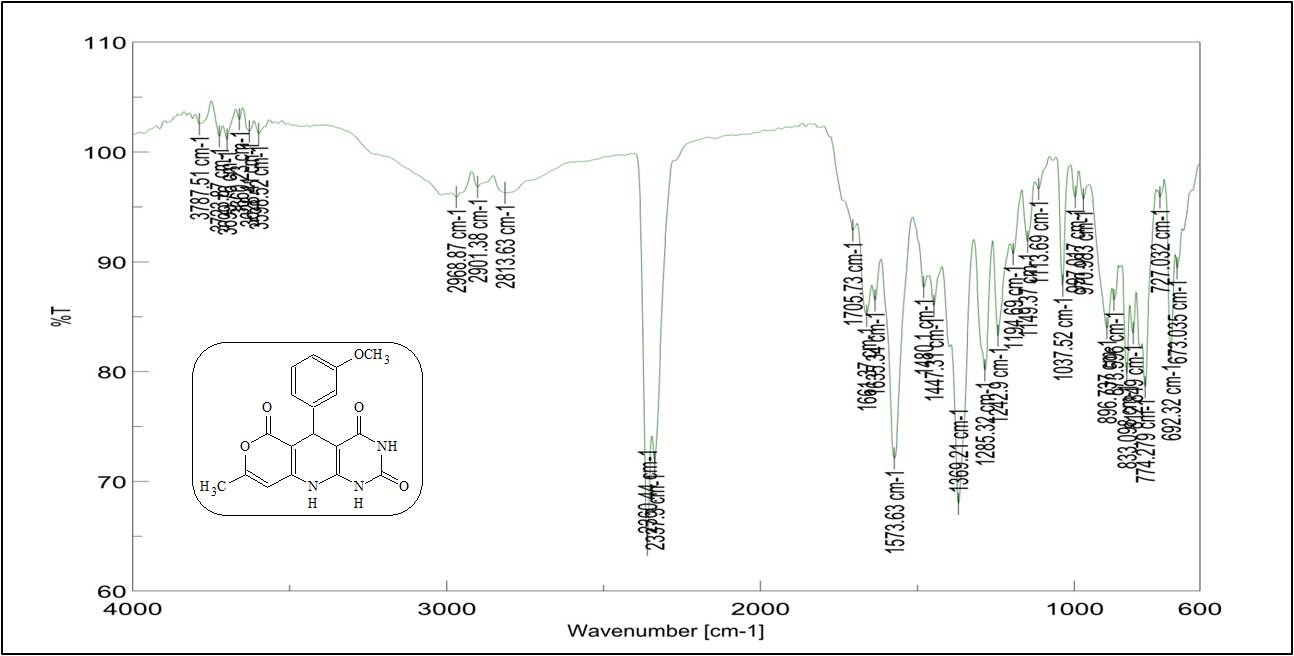


**Fig. 26: IR spectrum of 5-(3-methoxyphenyl)-8-methyl-5,10-dihydro-2*H*-pyrano[3',4':5,6]pyrido[2,3-*d*]pyrimidine-2,4,6(1*H*,3*H*)-trione (4d8)**


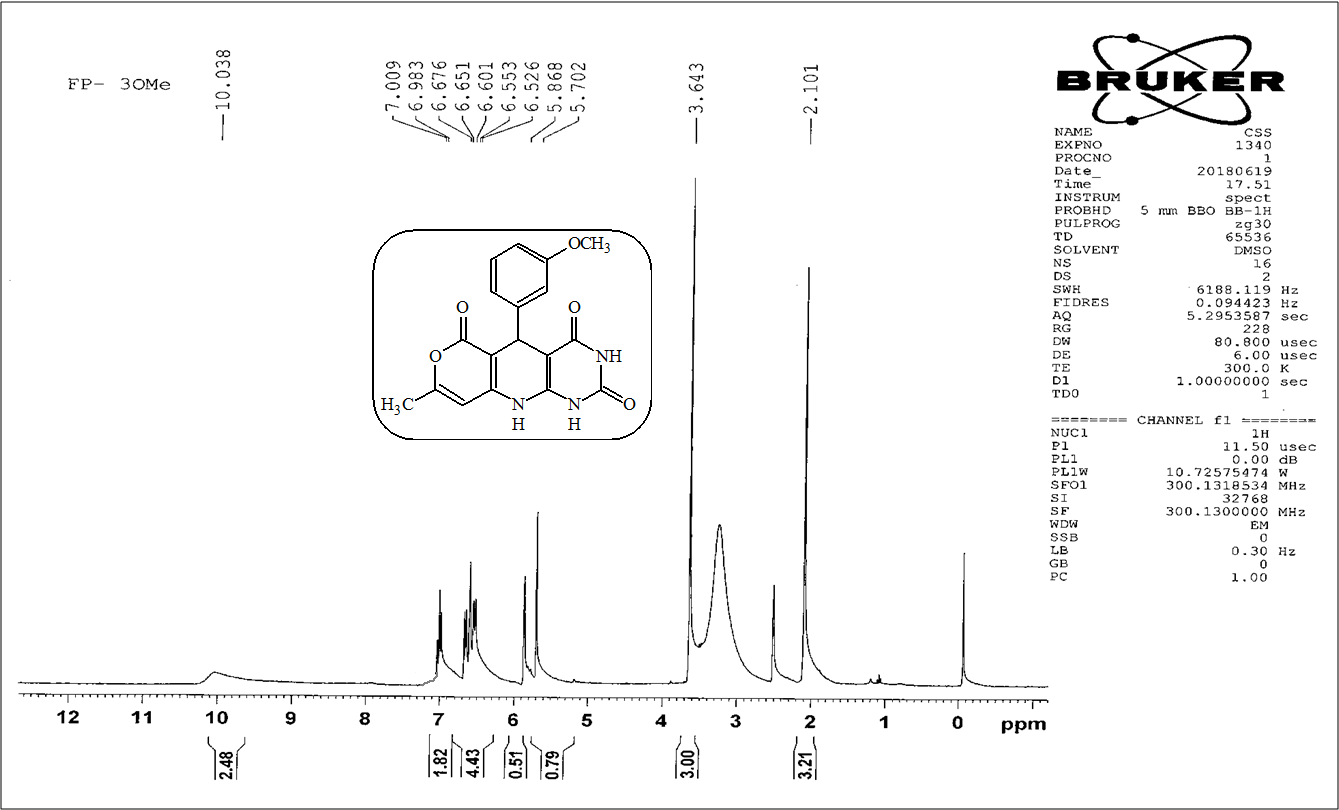


**Fig. 27: 1H NMR spectrum of 5-(3-methoxyphenyl)-8-methyl-5,10-dihydro-2*H*-pyrano[3',4':5,6]pyrido[2,3-*d*]pyrimidine-2,4,6(1*H*,3*H*)-trione (4d8)**


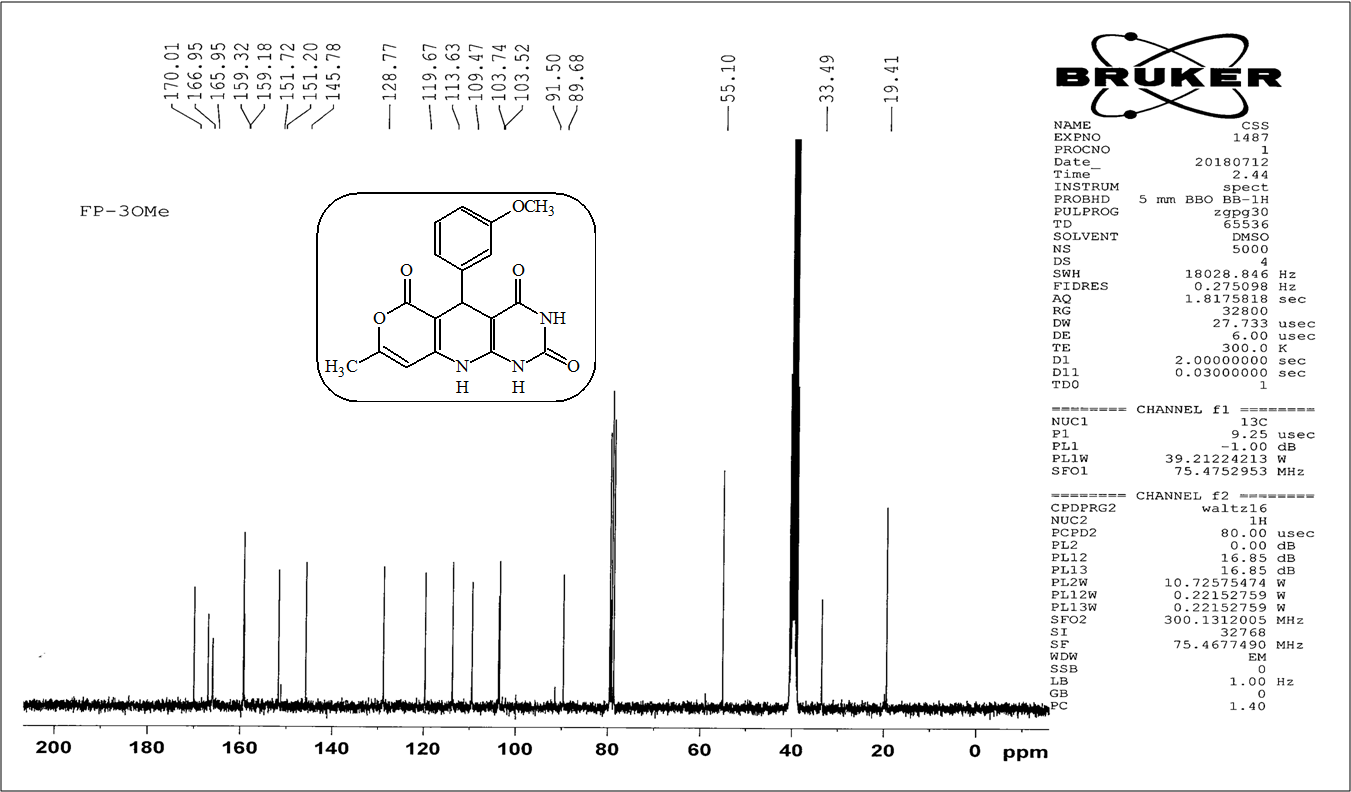


**Fig. 28: 13C NMR spectrum of 5-(3-methoxyphenyl)-8-methyl-5,10-dihydro-2*H*-pyrano[3',4':5,6]pyrido[2,3-*d*]pyrimidine-2,4,6(1*H*,3*H*)-trione (4d8)**


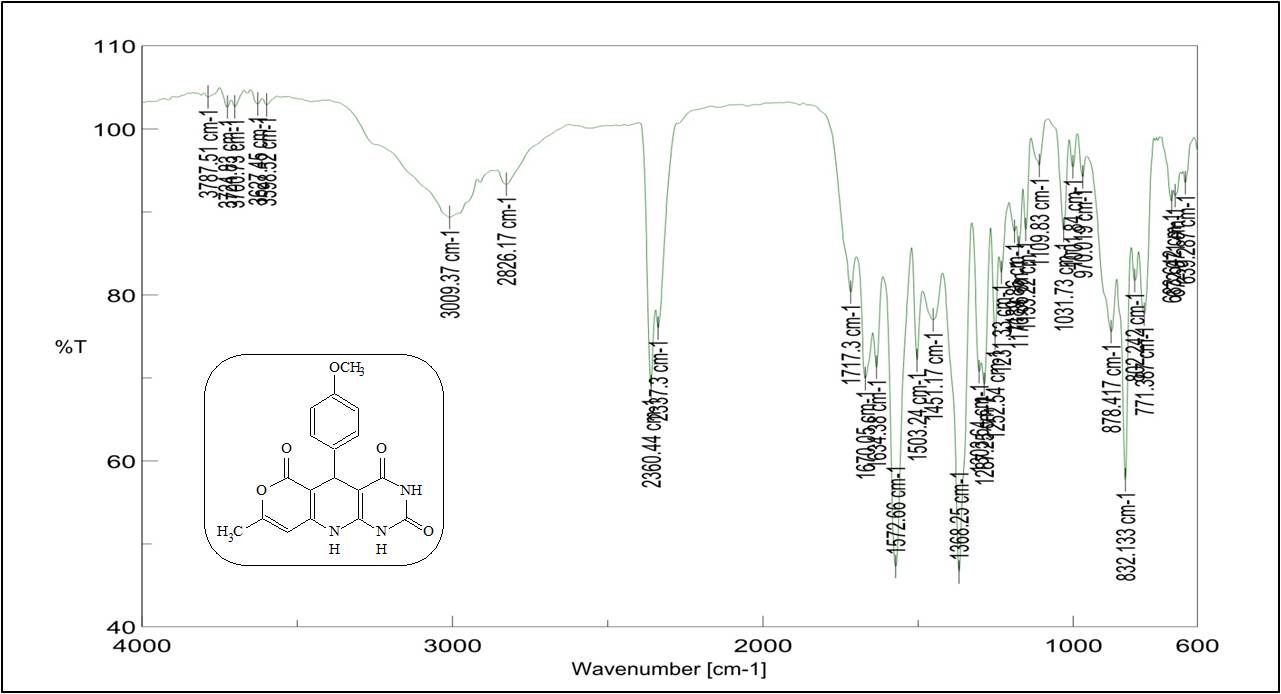


**Fig. 29: IR spectrum of 5-(4-methoxyphenyl)-8-methyl-5,10-dihydro-2*H*-pyrano[3',4':5,6]pyrido[2,3-*d*]pyrimidine-2,4,6(1*H*,3*H*)-trione (4d9)**


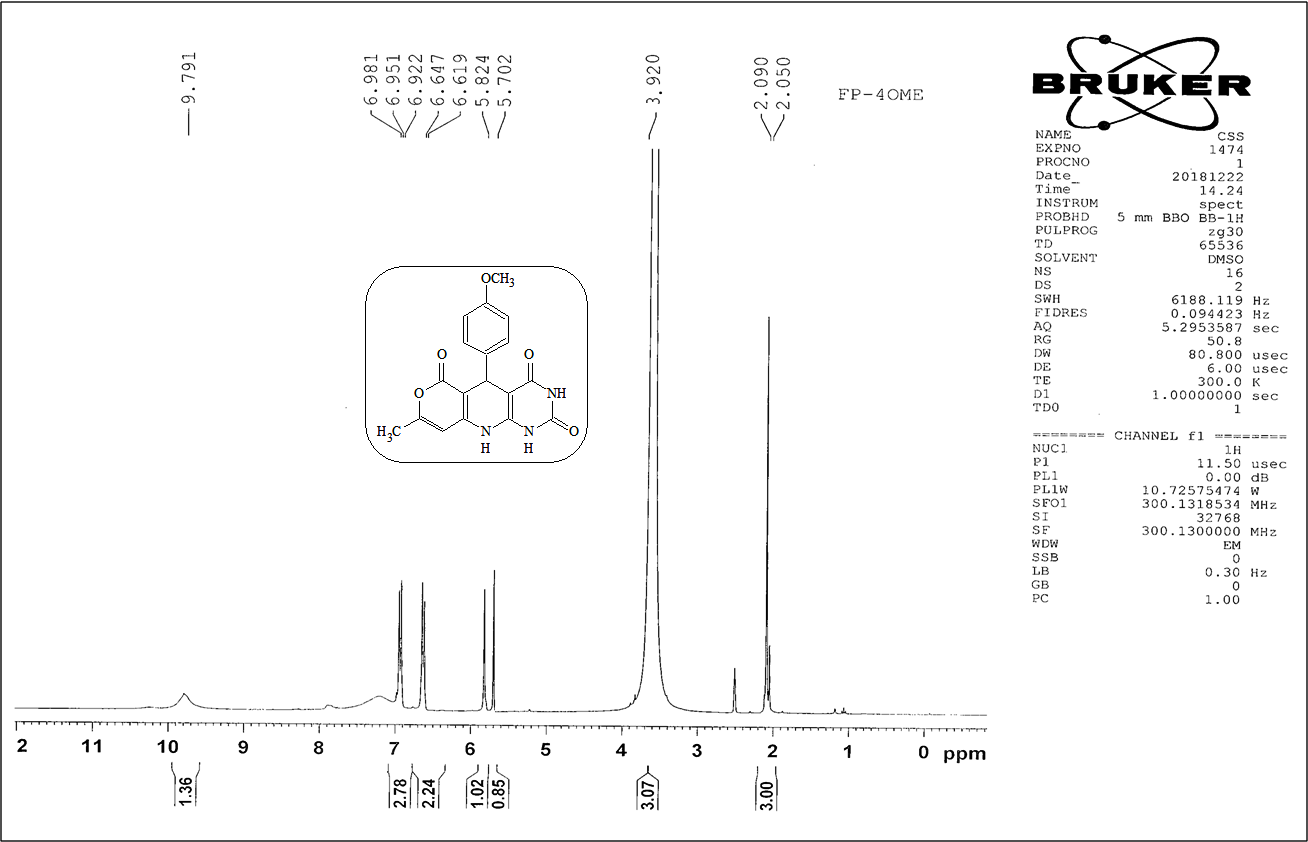


**Fig. 30: 1H NMR spectrum of 5-(4-methoxyphenyl)-8-methyl-5,10-dihydro-2*H*-pyrano[3',4':5,6]pyrido[2,3-*d*]pyrimidine-2,4,6(1*H*,3*H*)-trione (4d9)**

**
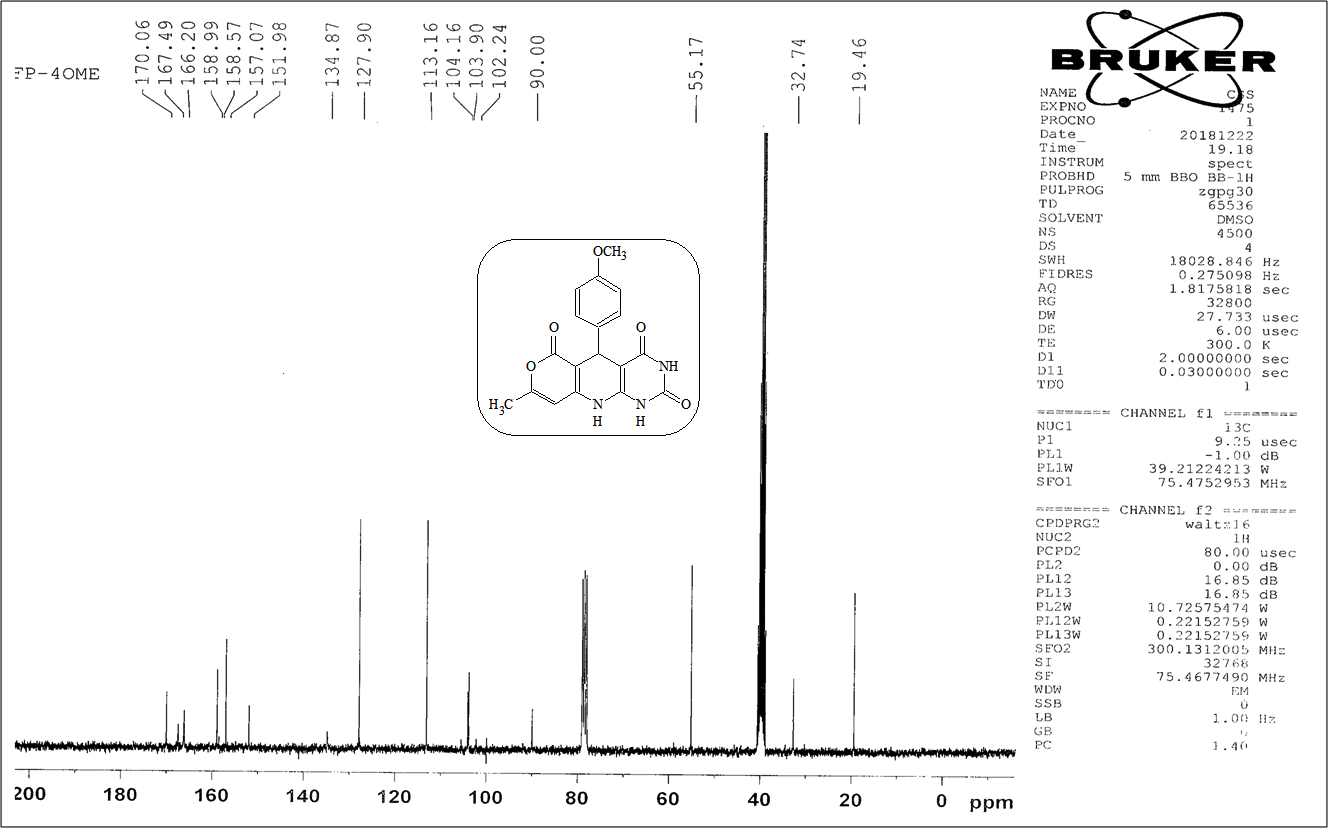
**

**Fig. 31: 13C NMR spectrum of 5-(4-methoxyphenyl)-8-methyl-5,10-dihydro-2*H*-pyrano[3',4':5,6]pyrido[2,3-*d*]pyrimidine-2,4,6(1*H*,3*H*)-trione (4d9)**


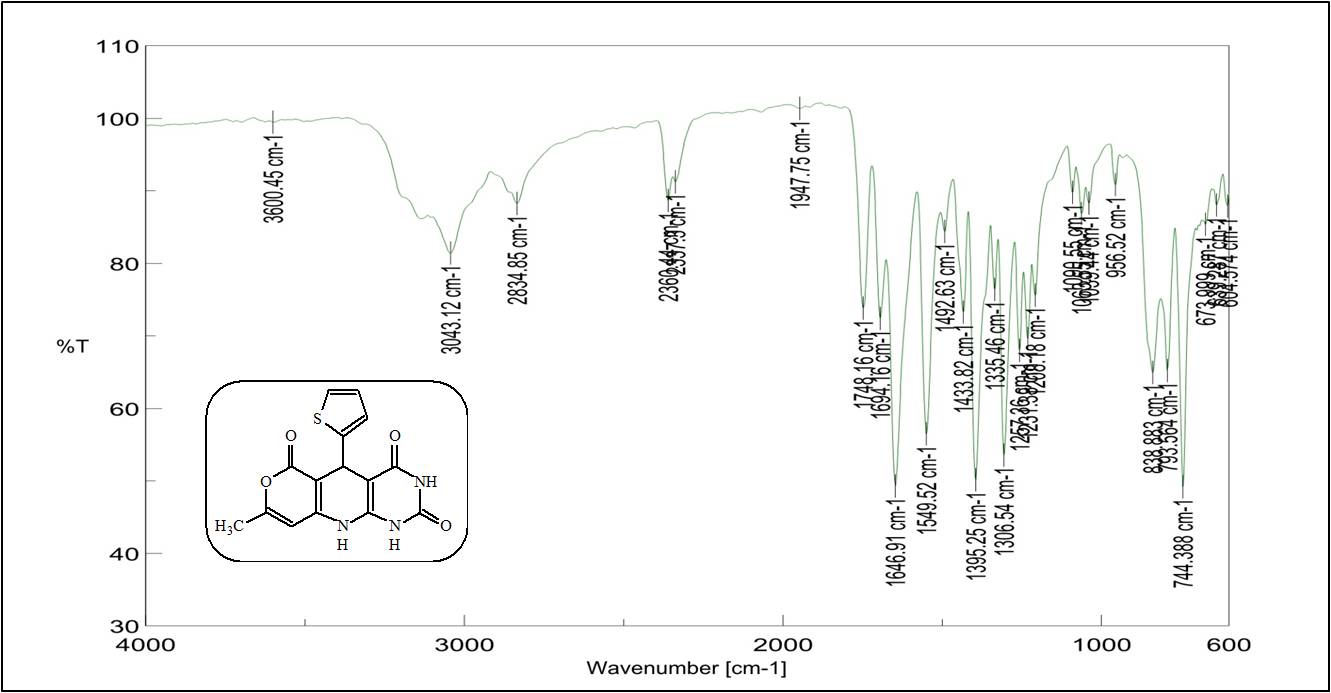


**Fig. 32: IR spectrum of 8-methyl-5-(thiophen-2-yl)-5,10-dihydro-2*H*-pyrano[3',4':5,6]pyrido[2,3-*d*]pyrimidine-2,4,6(1*H*,3*H*)-trione (4d10)**


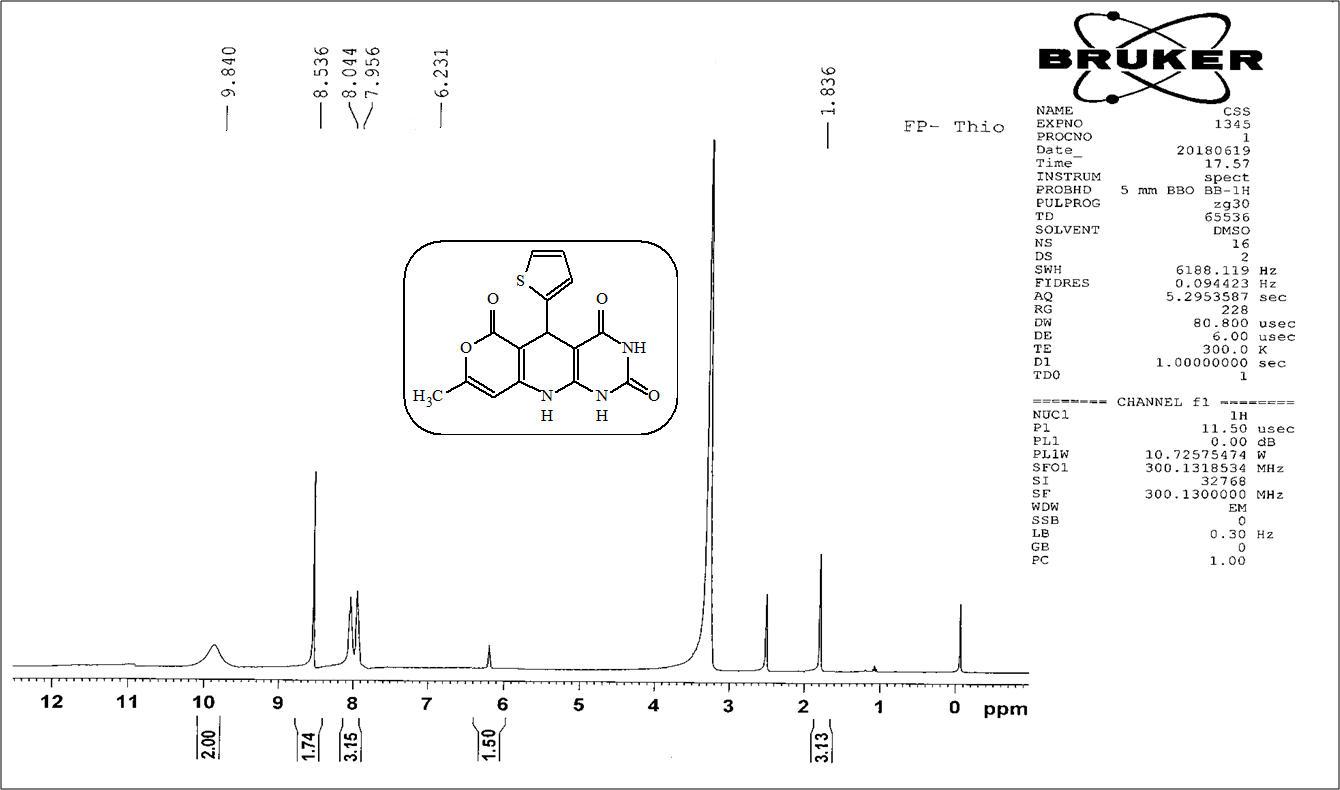


**Fig. 33: 1H NMR spectrum of 8-methyl-5-(thiophen-2-yl)-5,10-dihydro-2*H*-pyrano[3',4':5,6]pyrido[2,3-*d*]pyrimidine-2,4,6(1*H*,3*H*)-trione (4d10)**


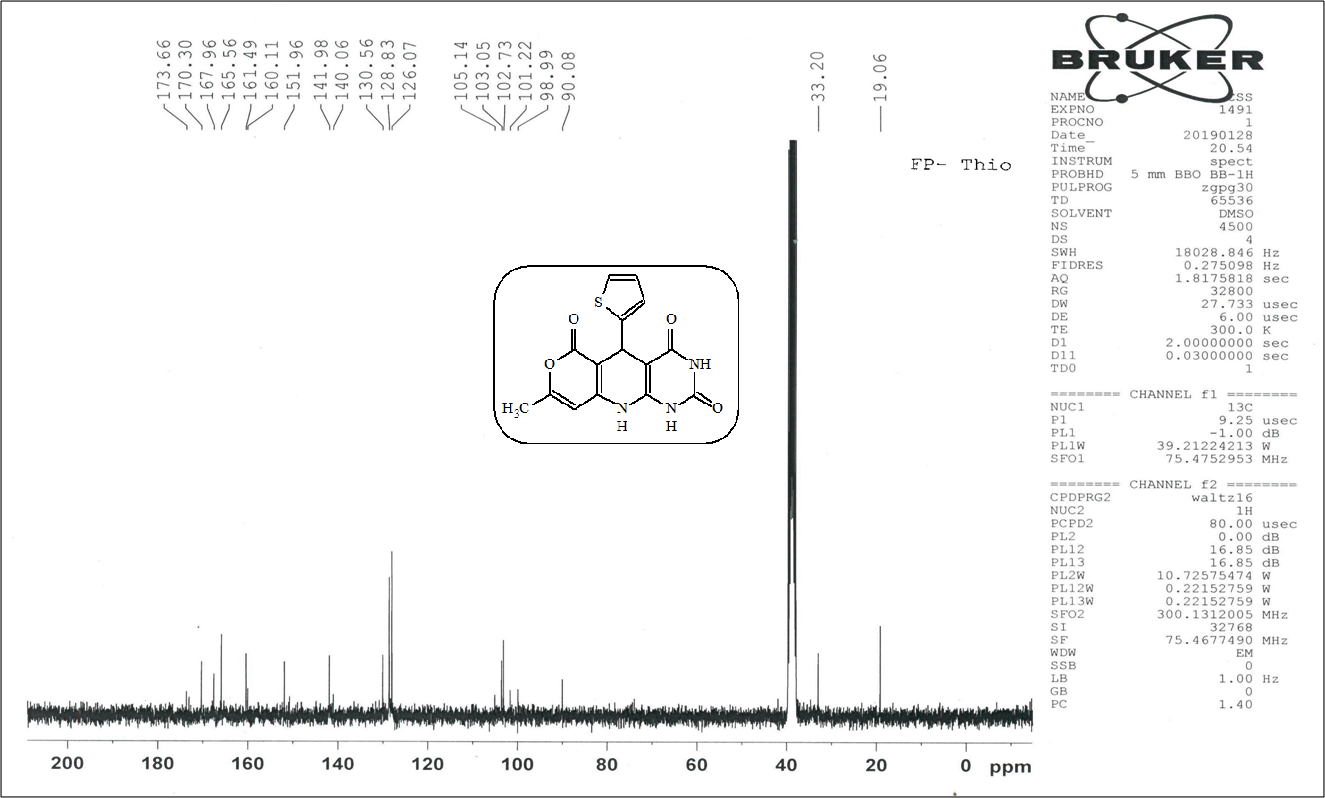


**Fig. 34: 13C NMR spectrum of 8-methyl-5-(thiophen-2-yl)-5,10-dihydro-2*H*-pyrano[3',4':5,6]pyrido[2,3-*d*]pyrimidine-2,4,6(1*H*,3*H*)-trione (4d10)**


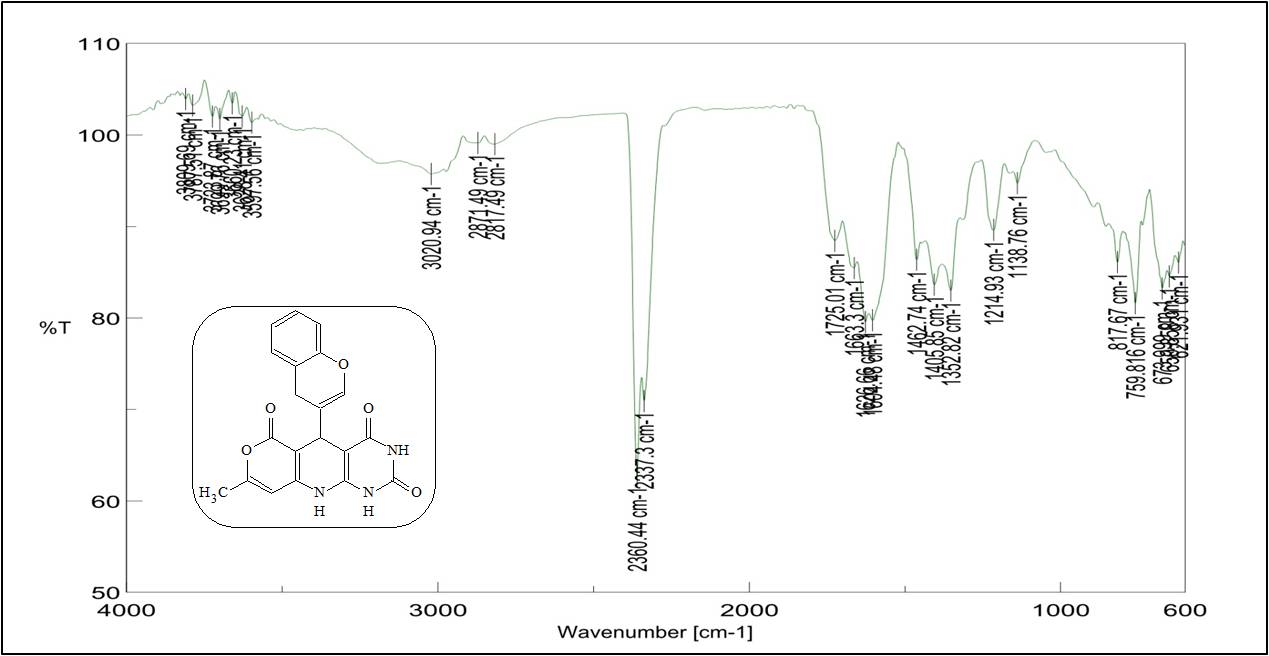


**Fig. 35: IR spectrum of 5-(4*H*-1-benzopyran-3-yl)-8-methyl-5,10-dihydro-2*H*-pyrano[3',4':5,6] pyrido [2,3-*d*] pyrimidine-2,4,6(1*H*,3*H*)-trione (4d11)**

**
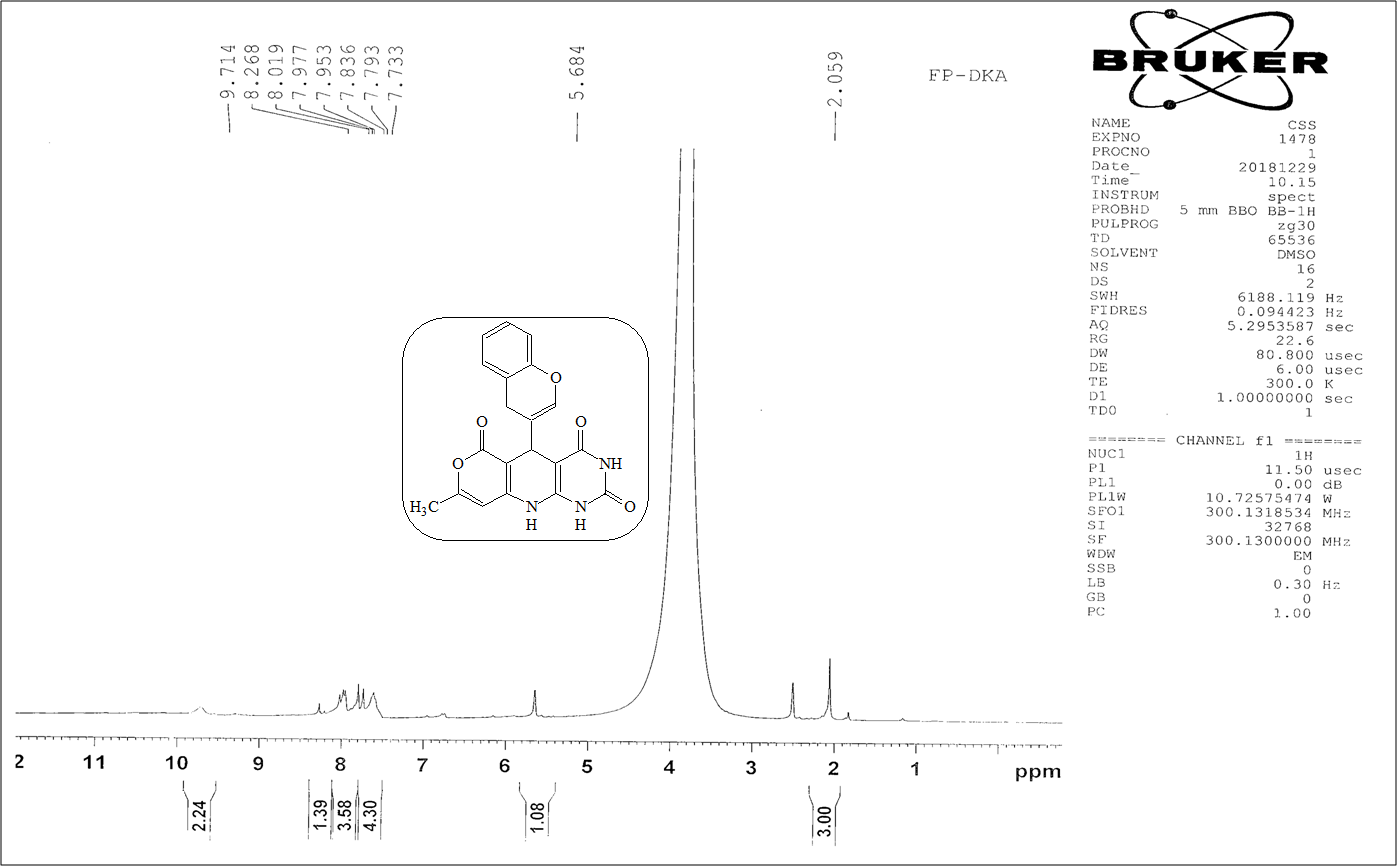
**

**Fig. 36: 1H NMR spectrum of 5-(4*H*-1-benzopyran-3-yl)-8-methyl-5,10-dihydro-2*H*-pyrano[3',4':5,6] pyrido [2,3-*d*] pyrimidine-2,4,6(1*H*,3*H*)-trione (4d11)**

**
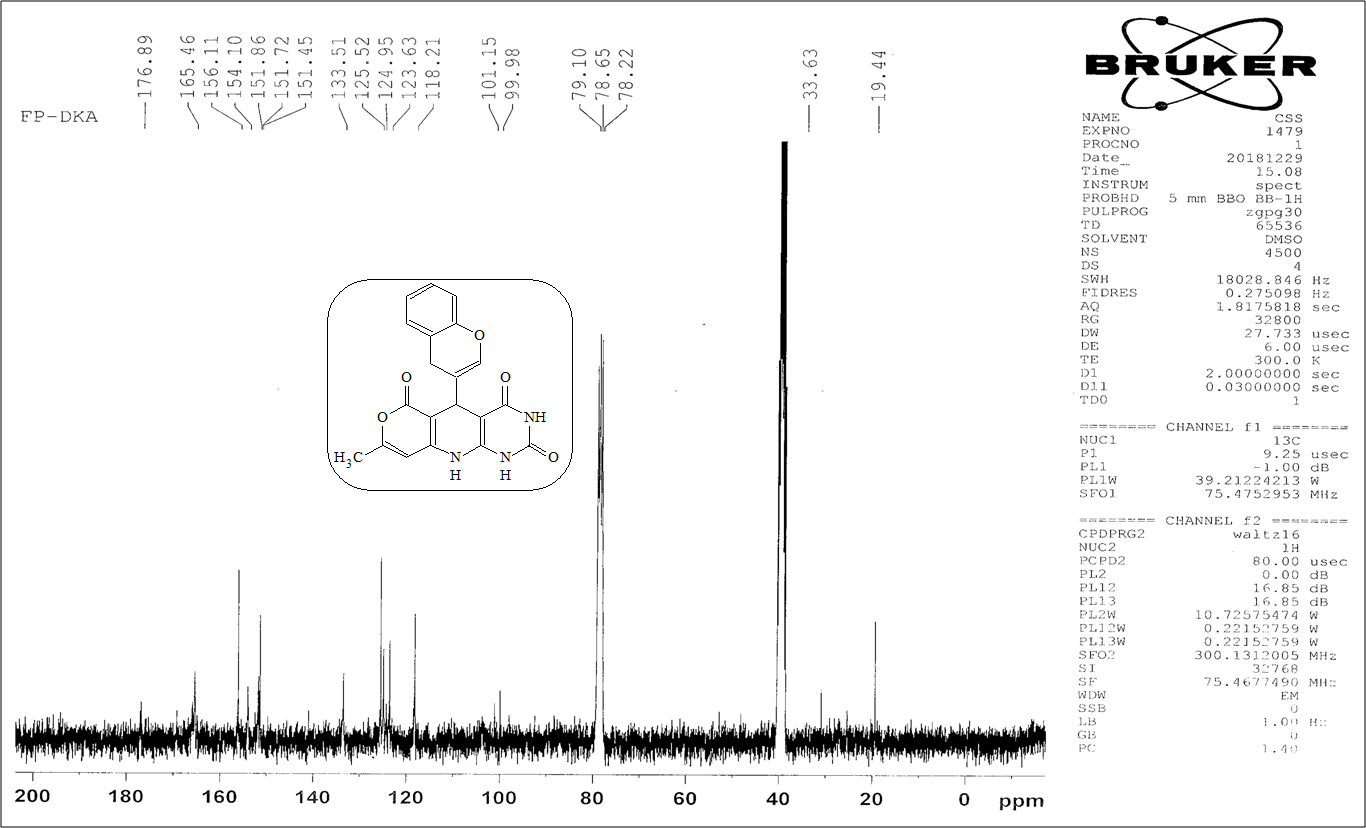
**

**Fig. 37: 13C NMR spectrum of 5-(4*H*-1-benzopyran-3-yl)-8-methyl-5,10-dihydro-2*H*-pyrano[3',4':5,6] pyrido [2,3-*d*] pyrimidine-2,4,6(1*H*,3*H*)-trione (4d11)**


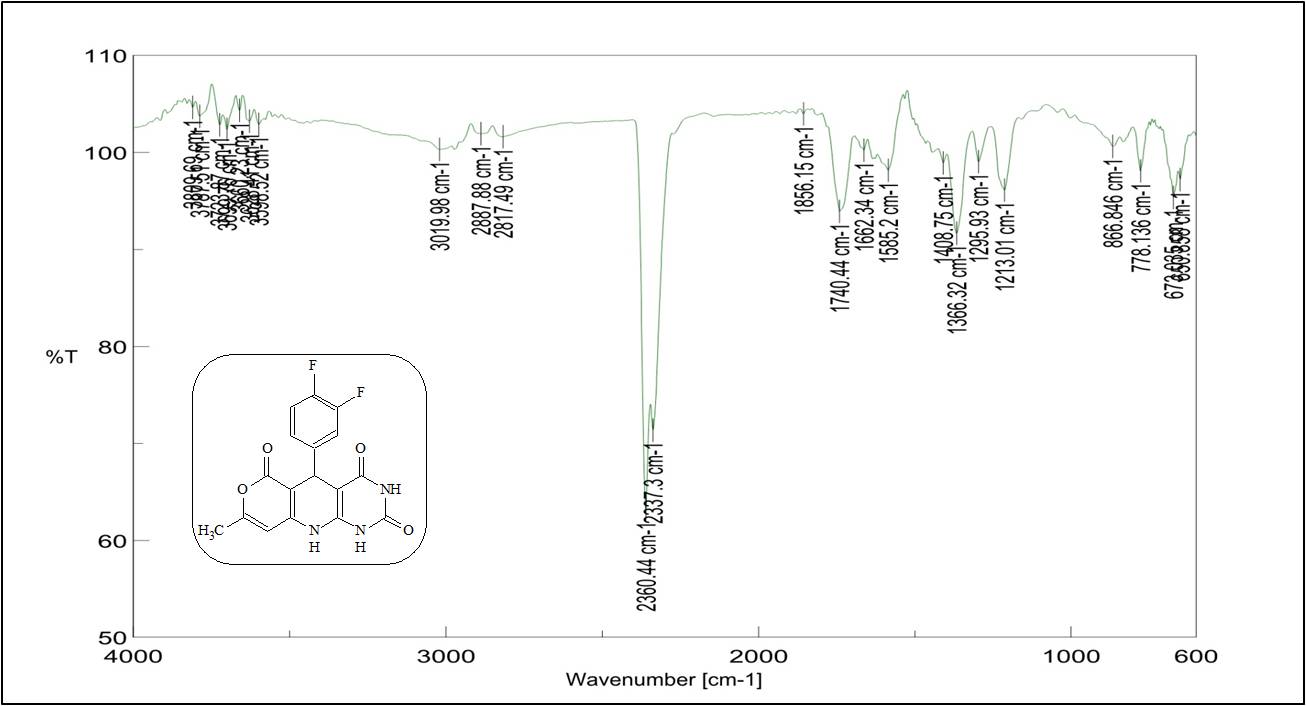


**Fig. 38:IR spectrum of 5-(3,4-difluorophenyl)-8-methyl-5,10-dihydro-2*H* pyrano[3',4':5,6]pyrido[2,3-*d*]pyrimidine-2,4,6(1*H*,3*H*)-trione (4d12)**


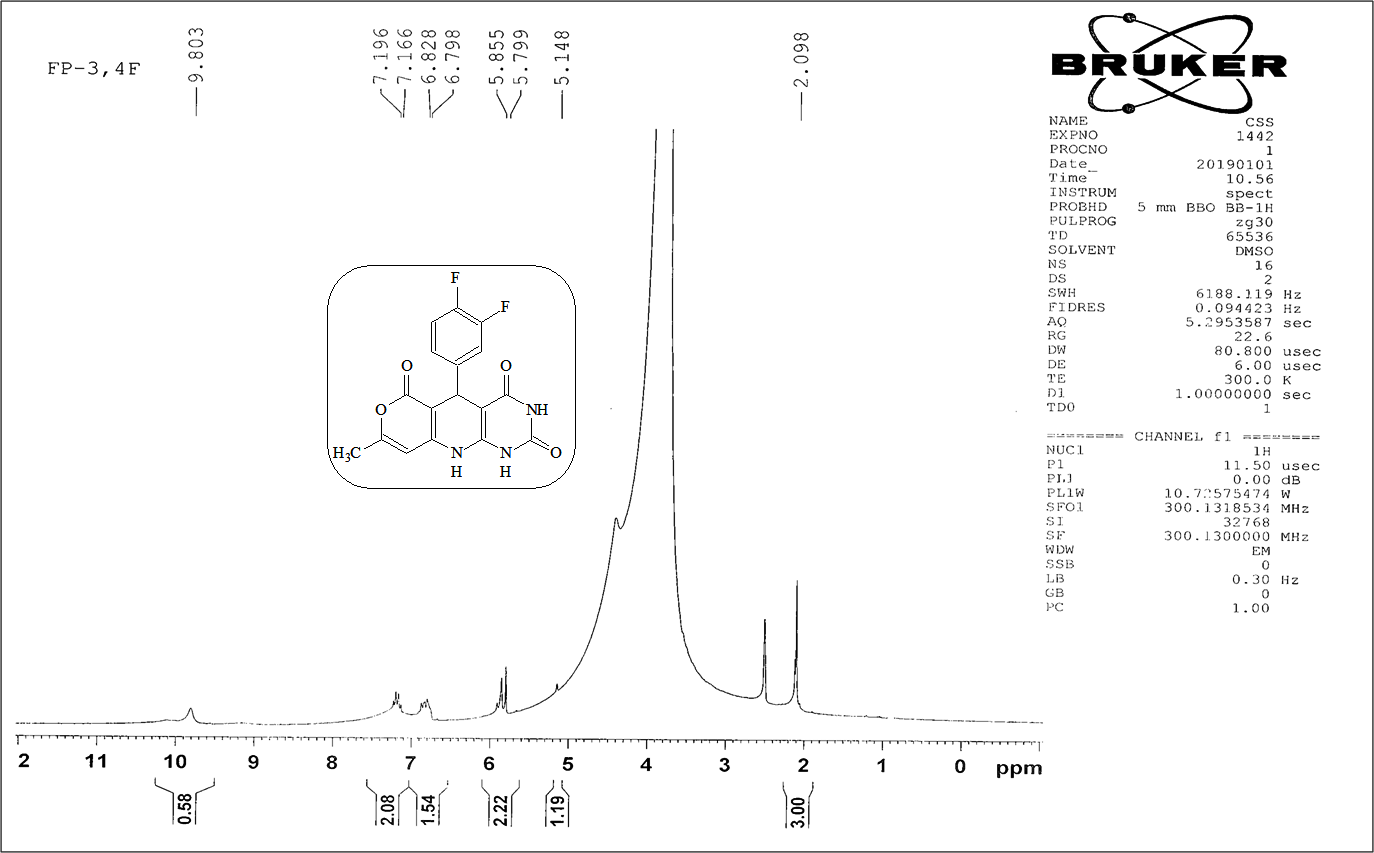


**Fig. 39: 1H NMR spectrum of 5-(3,4-difluorophenyl)-8-methyl-5,10-dihydro-2*H*-pyrano[3',4':5,6]pyrido[2,3-*d*]pyrimidine-2,4,6(1*H*,3*H*)-trione (4d12)**


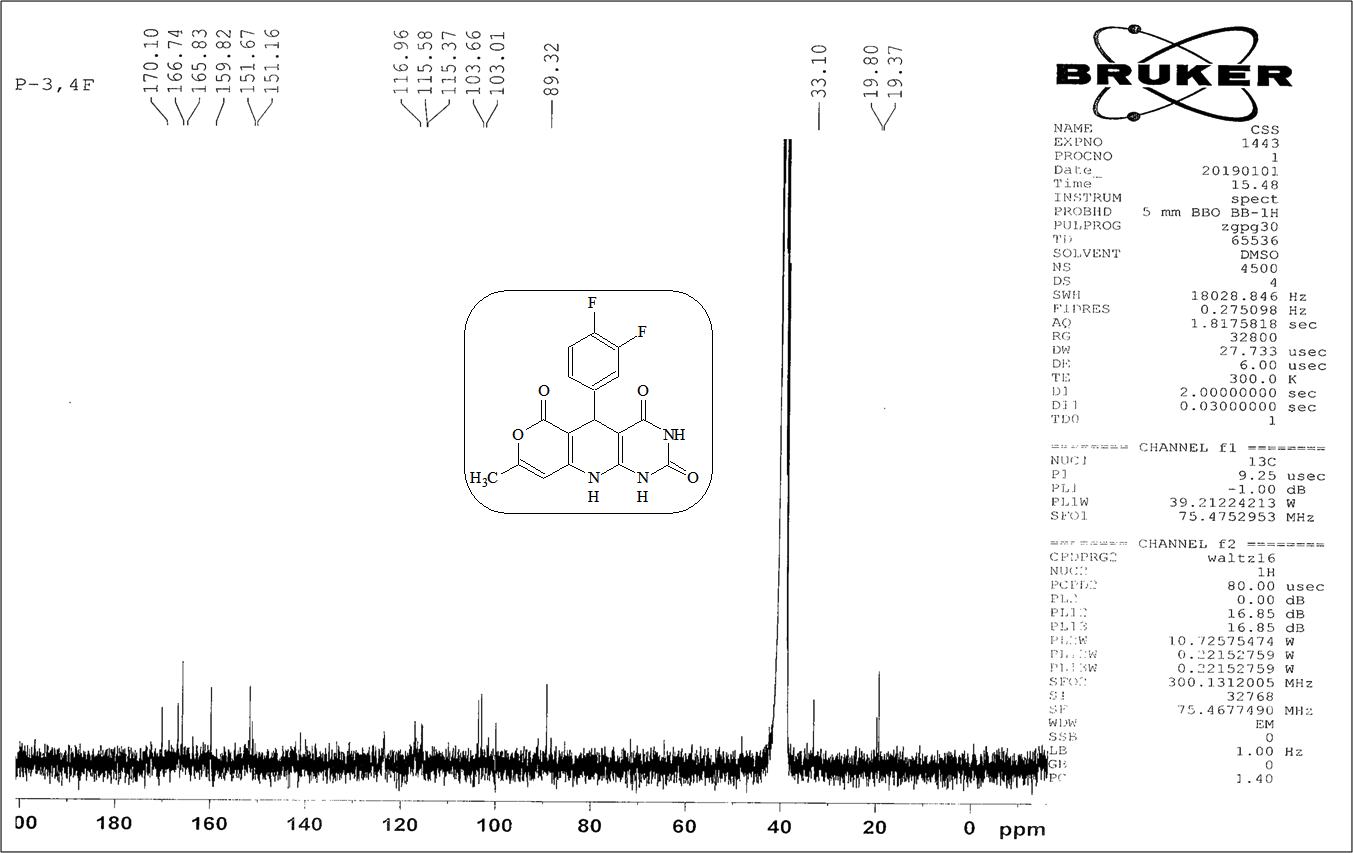


**Fig. 40: 13C NMR spectrum of 5-(3,4-difluorophenyl)-8-methyl-5,10-dihydro-2*H*-pyrano[3',4':5,6]pyrido[2,3-*d*]pyrimidine-2,4,6(1*H*,3*H*)-trione (4d12)**


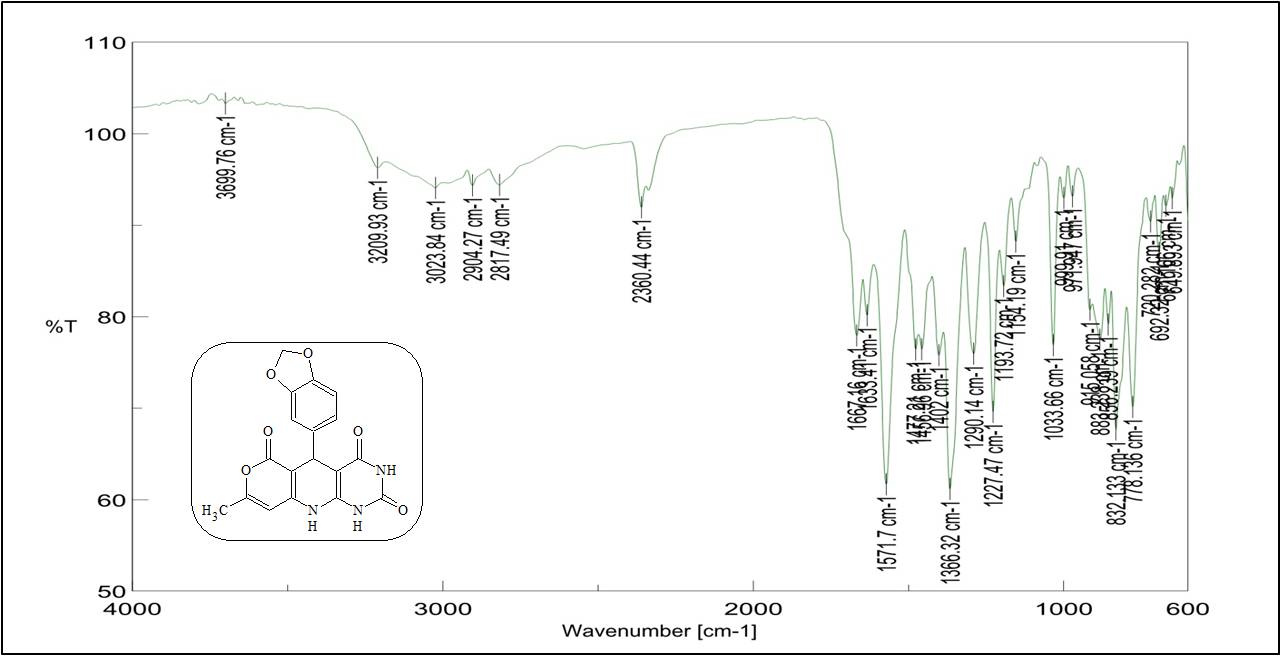


**Fig. 41: IR spectrum of 5-(2*H*-1,3-benzodioxol-5-yl)-8-methyl-5,10-dihydro-2*H*-pyrano[3',4':5,6]pyrido[2,3-*d*]pyrimidine-2,4,6(1*H*,3*H*)-trione (4d13)**


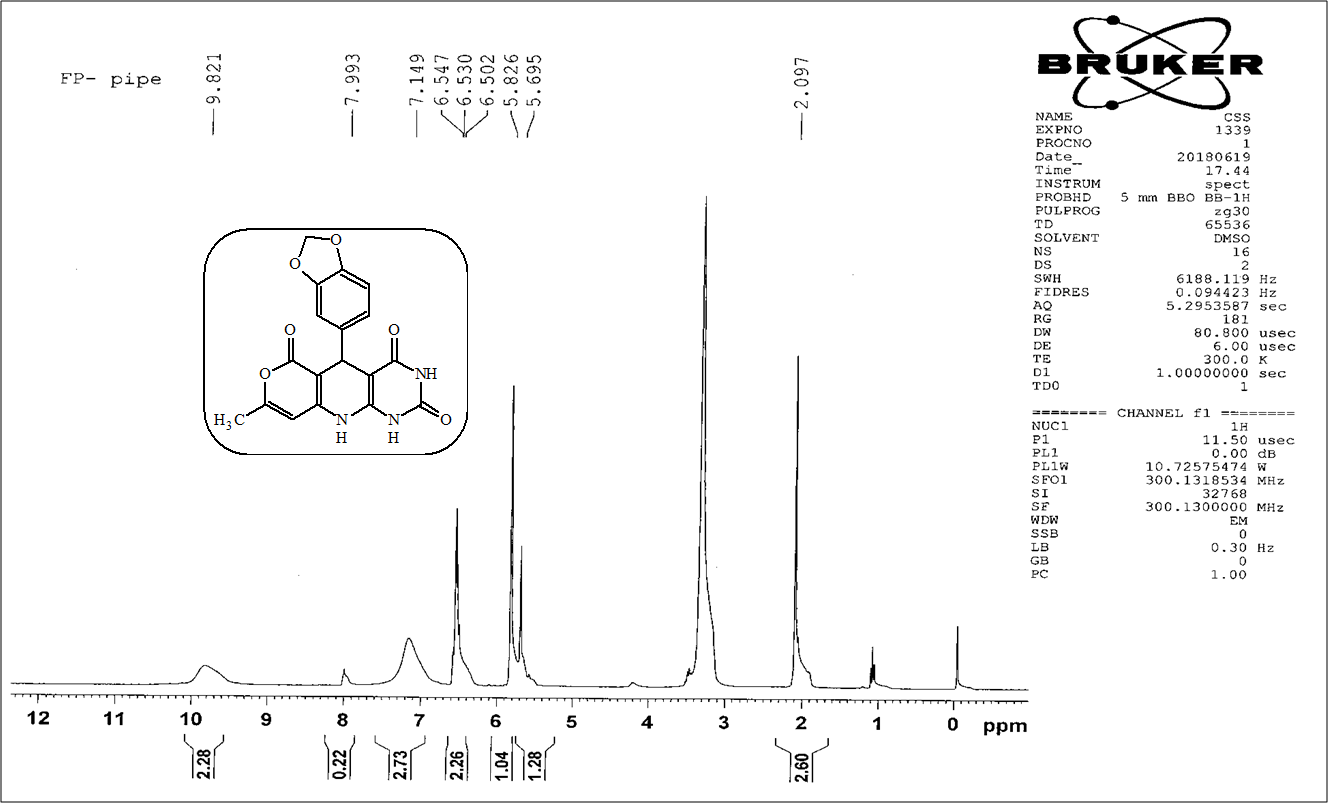


**Fig. 42: 1H NMR spectrum of 5-(2*H*-1,3-benzodioxol-5-yl)-8-methyl-5,10-dihydro-2*H*-pyrano[3',4':5,6]pyrido[2,3-*d*]pyrimidine-2,4,6(1*H*,3*H*)-trione (4d13)**


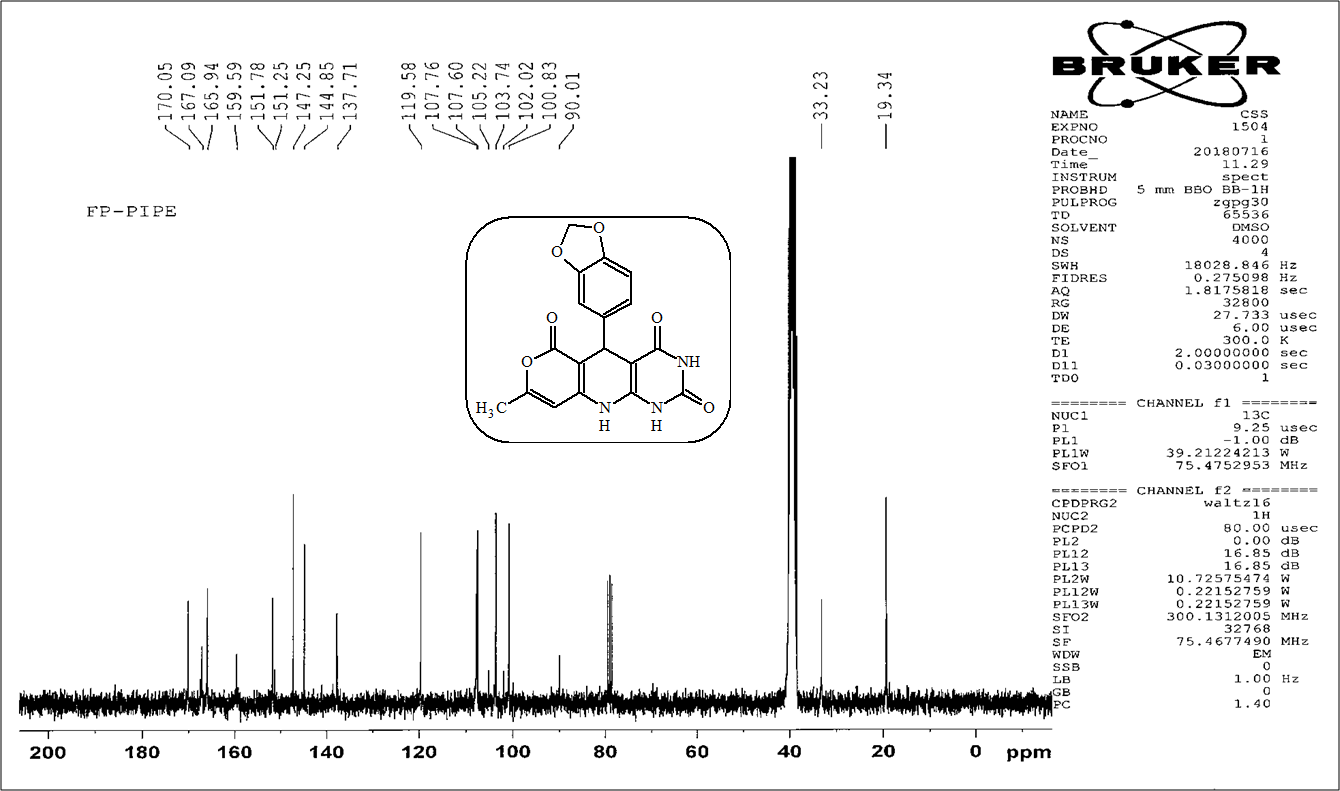


**Fig. 43: 13C NMR spectrum of 5-(2*H*-1,3-benzodioxol-5-yl)-8-methyl-5,10-dihydro-2*H*-pyrano[3',4':5,6]pyrido[2,3-*d*]pyrimidine-2,4,6(1*H*,3*H*)-trione (4d13)**
